# A General Theory of Differentiated Multicellularity

Felipe A. Veloso<sup>1</sup>✉

<sup>1</sup>Faculty of Biological Sciences, Universidad Andrés Bello, Santiago, Chile

✉Correspondence: [veloso.felipe.a@gmail.com](mailto:veloso.felipe.a@gmail.com)

## Abstract

Scientists agree that changes in the levels of gene expression are important for the cell differentiation process. Research in the field has customarily assumed that such changes regulate this process when they interconnect in space and time by means of complex epigenetic mechanisms. In fundamental terms, however, this assumed regulation refers only to the intricate propagation of changes in gene expression or else leads to logical inconsistencies. Additionally, the evolution and intrinsic regulatory dynamics of differentiated multicellularity lack a unified and falsifiable description. To fill this gap, I analyzed publicly available high-throughput data of histone H3 post-translational modifications and mRNA abundance for different *Homo sapiens*, *Mus musculus*, and *Drosophila melanogaster* cell-type/developmental-period samples. An analysis of genomic regions adjacent to transcription start sites generated for each cell-type/developmental-period dataset a profile from pairwise partial correlations between histone modifications controlling for the respective mRNA levels. Here I report that these profiles, while explicitly uncorrelated to transcript abundance by construction, associate strongly with cell differentiation states. This association is not expected if cell differentiation is, in effect, regulated by epigenetic mechanisms. Based on these results, I propose a theory that relies on the synergistic coupling across the extracellular space of two stochastically independent “self-organizing” systems constraining histone modification states at the same sites. This theory describes how the differentiated multicellular organism—understood as an intrinsic, higher-order, self-sufficient, self-repairing, self-replicating, and self-regulating constraint—emerges from proliferating undifferentiated cells. If it resists falsification, this theory will explain (i) the intrinsic regulation of gene transcriptional changes during cell differentiation and (ii) the emergence of differentiated multicellular lineages throughout evolution.

## Introduction

Cell differentiation, if seen as a motion picture in fast-forward, intuitively appears to be a teleological or “end-directed” process, its *telos* or “end” being the multicellular organism in its mature form. The first step for a scientific explanation of this apparent property was given in 1957 when Conrad Waddington proposed his epigenetic landscape model. Influenced by earlier developments in dynamical systems theory [1], Waddington’s model showed cell differentiation to be potentially predictable or at least potentially explainable without any teleological reference [2].

The dynamics of the cell differentiation process have been associated with changes in chromatin states and concurrent heritable changes in gene expression that are uncorrelated to changes in the DNA sequence, and therefore defined as epigenetic changes [3, 4]. In some cases, these changes can be regulated extrinsically with respect to the developing organism, as observable in eusocial insects (e.g., a female honeybee larva develops into a worker or a queen depending on the royal jelly diet it is fed [5]). Yet most key changes in gene expression during cell differentiation are not only independent from, but are even robust with respect to extrinsic variables. This indicates that cell differentiation is fundamentally an intrinsically regulated process, for which no falsifiable theory has emerged from the epigenetic framework. Due to our lack of understanding of the precise regulatory dynamics, this process has also been dubbed “The X-files of chromatin” [6].

To unravel these X-files, we have to look critically at (i) the regulation of cell differentiation as it is understood today, (ii) the non-genetic information contained supposedly in primordial cells (zygotes, spores, or buds), and (iii) cell potency. Modern science regards cell differentiation fundamentally as a dynamical system, where a fixed rule governs the transition between the realizable states of a complex network of molecular mechanisms. Ranging from low-order molecular interactions [7] to chromatin higher-order structural changes [8, 9], these epigenetic mechanisms not only propagate changes in gene expression in different loci as cells proliferate but, importantly, are also hypothesized to regulate intrinsically the cell differentiation process. This hypothesis is accepted as well-established fact (as illustrated in [10]) even though the epigenetic mechanisms involved in cell differentiation are far from being elucidated. Yet this epigenetic regulation hypothesis leads to severe explanatory limitations and may even entail logical inconsistencies.

If one assumes that this hypothesis is true in its strictest sense, one accepts that gene self-regulation is a teleological property of cell differentiation. For example, one might assume that certain *gene A* is an explanatory component of the general self-regulatory property once a researcher who modifies the expression levels of *gene A* in a given organism elucidates how these changes activate or repress *gene B*, *gene C*, and *gene D* during differentiation. However, this assertion overlooks that the researcher, not *gene A*, was the true regulator by purposefully imposing certain transcriptional states (on *gene A*, and by means of *gene A*, also *gene B*, *gene C*, and *gene D*). Yet, no human regulator is needed during the natural process, which raises the question of what system is truly regulating *gene B*, *gene C*, *gene D* AND *gene A*—and by extension, all genes during cell differentiation. Moreover, accounting for the regulation of transcriptional states in a gene locus by previous transcriptional states in other gene loci—in the same cell or any other—is only a non-explanatory regress (see [Figure 1](#)).

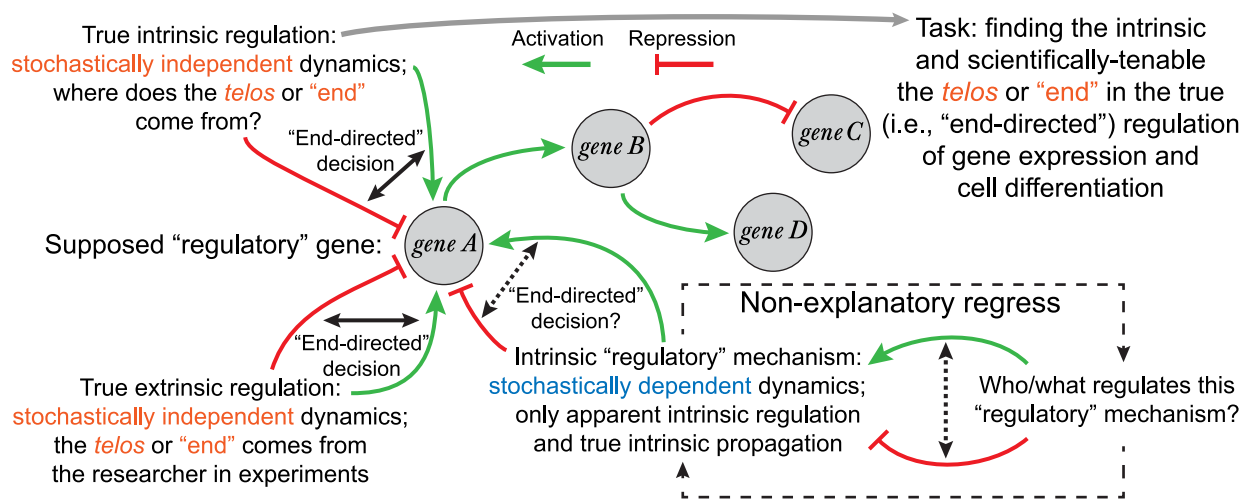

**Figure 1: Limitations of the epigenetic landscape**

This framework either falls into a non-explanatory regress when attempting to account for the intrinsic regulation of changes in gene expression during cell differentiation or uses "regulation" simply as a placeholder for what it is only the propagation of such changes, bracketing true intrinsic regulation from further inquiry.

If one assumes that the epigenetic regulation hypothesis is true in a loose sense, one has to use "self-regulation" only as a placeholder when referring to a certain class of molecular mechanisms propagating changes in gene expression. In this context, an "epigenator"—a transient signal which probably originates in the environment of the cell—would trigger the epigenetic phenotype change after being transduced into the intracellular space [11]. However, if all "epigenators" in the developing organism are extrinsic to it, self-regulation is *ipso facto* unexplainable. Otherwise, the critical signaling property of an "extracellular signal" is left unexplained.

The question arises if it is possible that critical changes within a developing organism, and the intrinsic regulation of such changes, are completely different processes at the most fundamental level. Specifically, intrinsic regulation may not be a molecular mechanism correlating critical changes in gene expression within a developing organism but instead involves particular *constraints* (understood as local boundary conditions that are level-of-scale specific) on those changes. Importantly, these particular constraints—imposed by the regulatory system we look for—are so because they *must be stochastically independent* (i.e., explicitly uncorrelated; see a mathematical description in the Appendix) from the changes this system is supposed to regulate; otherwise the system is fundamentally just an additional mechanism propagating gene expression changes more or less extensively (depending, for example, on the presence of feedback loops) instead of *regulating* them. This explanatory limitation is inescapable: a nonlinear propagation of changes in gene expression only implies either a nonlinear dependence between those changes—describable by a dynamical systems model such as the epigenetic landscape—or chaotic behavior, not a *regulated* propagation of changes. Moreover, intrinsic regulation cannot be explained in terms of any mechanism, machine (e.g., autopoietic [12]), nor any "self-organizing" system because all mechanisms, machines and "self-organizing" systems entail an explicit deterministic or stochastic dependence between all their component dynamics. Notably, however, the existence of "self-organizing" systems—a rather misleading term given there is no causally-efficacious *self* in such systems [13]—is a necessary condition for the intrinsic regulatory system of cell differentiation I will propose in this paper.

Regardless of the explanatory limitations inherent to the epigenetic landscape, it is generally believed that primordial cells contain most, if not all, the non-genetic information for later cell differentiation. If primordial cells contain all this information, including that for intrinsic regulation [14, 15], the previously discussed explanatory gap could, in principle, be filled. Asymmetric early cleavage, shown able to resolve a few cell lineage commitments (into six founder cells) in the nematode *Caenorhabditis elegans* [16], supports this possibility at first glance. However, a closer look at the developmental complexity of this simple metazoan model organism suggests otherwise: the hermaphrodite *C. elegans* ontogeny yields 19 different cell types (excluding the germ line) in a total of 1,090 generated cells. From these two parameters alone, the required information capacity for the entire process can be estimated to be at least 983 bit (see details in the Appendix). However, this is a great underestimation because uncertainty remains with respect to at least two other variables, namely space and time. Therefore, the non-genetic information capacity necessary for the entire cell differentiation process far exceeds the few bits of information that epigenetic mechanisms can account for. On the other hand, extrinsic constraints (e.g., diet-dependent hierarchy determination in eusocial insects [5], temperature-dependent sex determination in reptiles [17], or maternal regulation of offspring development [18]) do not account for all developmental decisions. These considerations highlight that certain *intrinsic* constraints must be identified to account for all the necessary non-genetic information in terms of capacity, which is measurable in units such as bits and content, which must account for *how* each developmental decision is made.

The question also arises on how it is possible for an entire organism to develop from *any* totipotent cell, and for embryonic tissues to develop from *any* pluripotent stem cell, if the information for all cell fate decisions is contained in the primordial cell (zygote)? The recently proposed “epigenetic disc” model for cell differentiation, under which the pluripotent state is only one among many metastable and directly interconvertible states [19], reflects the need to account for the significant dependence of developmental information on the cellular context.

Although David L. Nanney anticipated in 1958 that more important to development than the heritable material itself is the process by which heritable material may manifest different phenotypes [20], Waddington’s epigenetic landscape prevailed and ever since developmental biology has built upon the premise that primordial cells are indeed complete blueprints of the mature organism (allowing some degree of stochasticity [21, 22] and extrinsic influence as described previously). Thus, the epigenetic landscape framework is not only fundamentally unable to explain the intrinsic regulatory dynamics of cell differentiation, but has also forced research to ignore or reject the necessary *emergence* of information content during ontogeny.

## Results

To shed light into “The X-files of chromatin,” I designed and conducted a computational analysis of the combinatorial constraints on histone H3 post-translational modification states because of their strong statistical relationship with transcriptional levels [23]. As data source, I used publicly available tandem datasets of ChIP-seq (chromatin immunoprecipitation followed by high-throughput sequencing) on histone H3 modifications and RNA-seq (transcriptome high-throughput sequencing) on mRNA for *Homo sapiens*, *Mus musculus*, and *Drosophila melanogaster* cell-type, developmental-period, or developmental-time-point samples. The basis of the analysis was to define a numeric profile *ctalk\_non\_epi* (for “crosstalk that is non-epigenetic”), an  $n$ -tuple or ordered list of numerical values representing for any given sample the component of pairwise histone H3 crosstalk that is stochastically independent from gene transcription in genomic regions adjacent to transcription start sites (Figure 2).

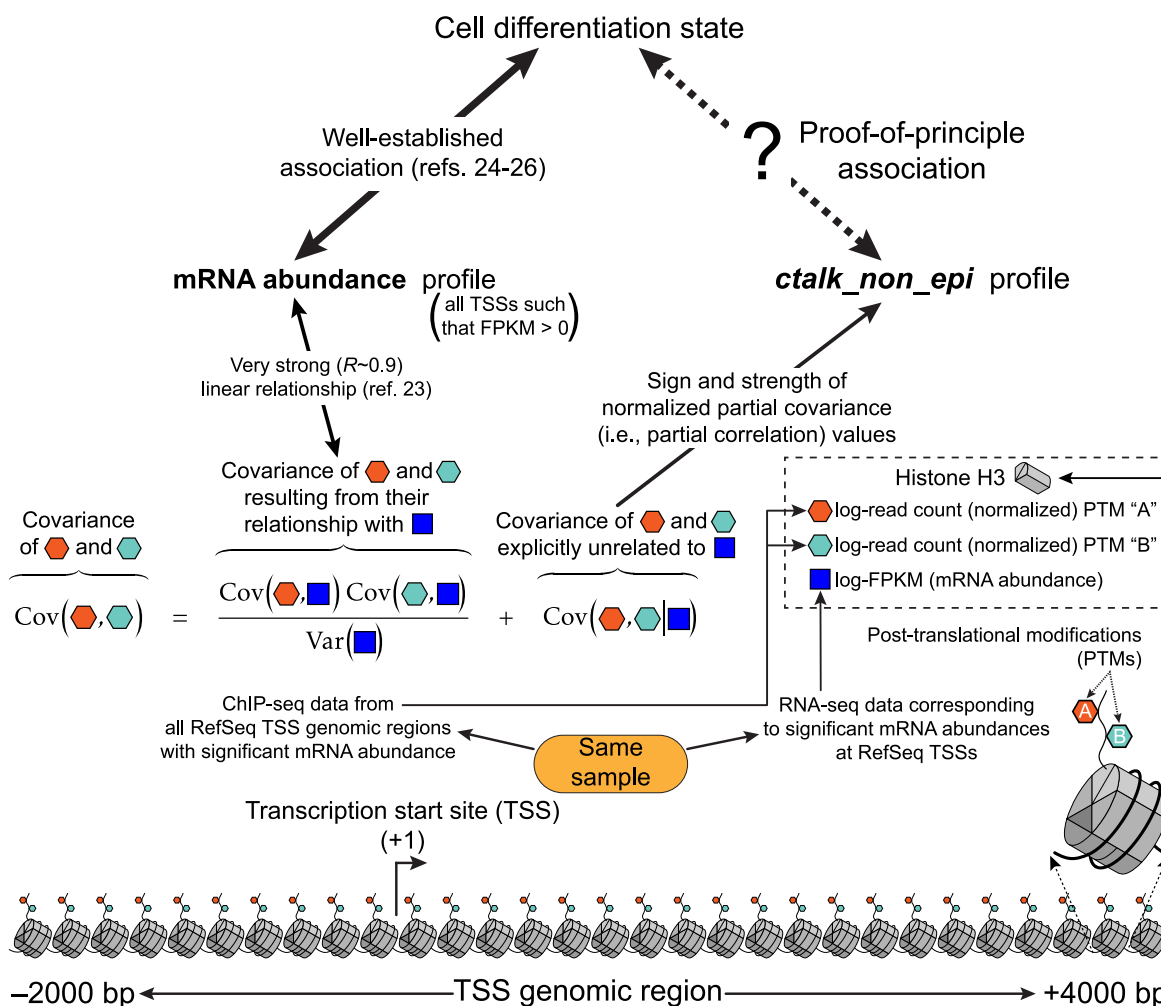

**Figure 2: Scheme of the proof-of-principle hypothesis and the computational analysis for its testing.**

*ctalk\_non\_epi* profiles represent constraints on histone H3 crosstalk that are *stochastically independent* from mRNA levels. The association between these *ctalk\_non\_epi* profiles and cell-differentiation states was the proof of principle for the theory proposed in this paper.

Under the arguments presented in the introduction, the aim of the computational analysis was to test the following proof-of-principle, working hypothesis: *for any given cell differentiation state and within genomic regions adjacent to transcription start sites, the component of pairwise histone H3 crosstalk that is stochastically independent from transcriptional levels* (represented by the *ctalk\_non\_epi* profile) *associates with that differentiation state* (Figure 2, black dashed arrow). Importantly, the null hypothesis (that is, no significant relationship exists between cell differentiation states and histone H3 crosstalk uncorrelated to mRNA levels) is further supported by the epigenetic landscape approach: if changes in mRNA levels not only associate with cell differentiation states [24, 25, 26] but also explain them completely, an additional non-epigenetic yet differentiation-associated type of constraint on histone H3 crosstalk is superfluous.

To test the proof-of-principle hypothesis, I applied hierarchical cluster analysis on the *ctalk\_non\_epi* profiles for each organism analyzed. If there is no significant association between *ctalk\_non\_epi* profiles and cell differentiation states (i.e., if the null hypothesis is true), the obtained clusters should be statistically insignificant or else they should not associate with cell differentiation states. However, the results showed in all analyses performed that *ctalk\_non\_epi* profiles fell into statistically significant clusters that associate with cell differentiation states in *Homo sapiens*, *Mus musculus*, and *Drosophila melanogaster*. Moreover, *ctalk\_non\_epi* profiles associated with cell differentiation states at least as strongly as mRNA abundance profiles. In sum, for all three organisms analyzed, the null hypothesis had to be consistently rejected in terms of a clear association between *ctalk\_non\_epi* profiles and cell differentiation states. This unambiguous result provides proof of principle for my theory, which requires differentiation-associated constraints on histone H3 crosstalk such that they are stochastically independent from mRNA levels.

### ***ctalk\_non\_epi* profiles of embryonic stem cells differ significantly from those of differentiated cell types in *Homo sapiens***

Using data for nine different histone H3 modifications, I computed *ctalk\_non\_epi* profiles for six human cell types. From these, all profiles corresponding to differentiated cell types, namely HSMM (skeletal muscle myoblasts), HUVEC (umbilical vein endothelial cells), NHEK (epidermal keratinocytes), GM12878 (B-lymphoblastoids), and NHLF (lung fibroblasts) fell into the largest cluster. This significance was expressed in **au** (approximately unbiased) and **bp** (bootstrap probability) significance scores, which were greater than or equal to 95 (Figure 3A, cluster #4), indicating that the largest cluster was also statistically significant.

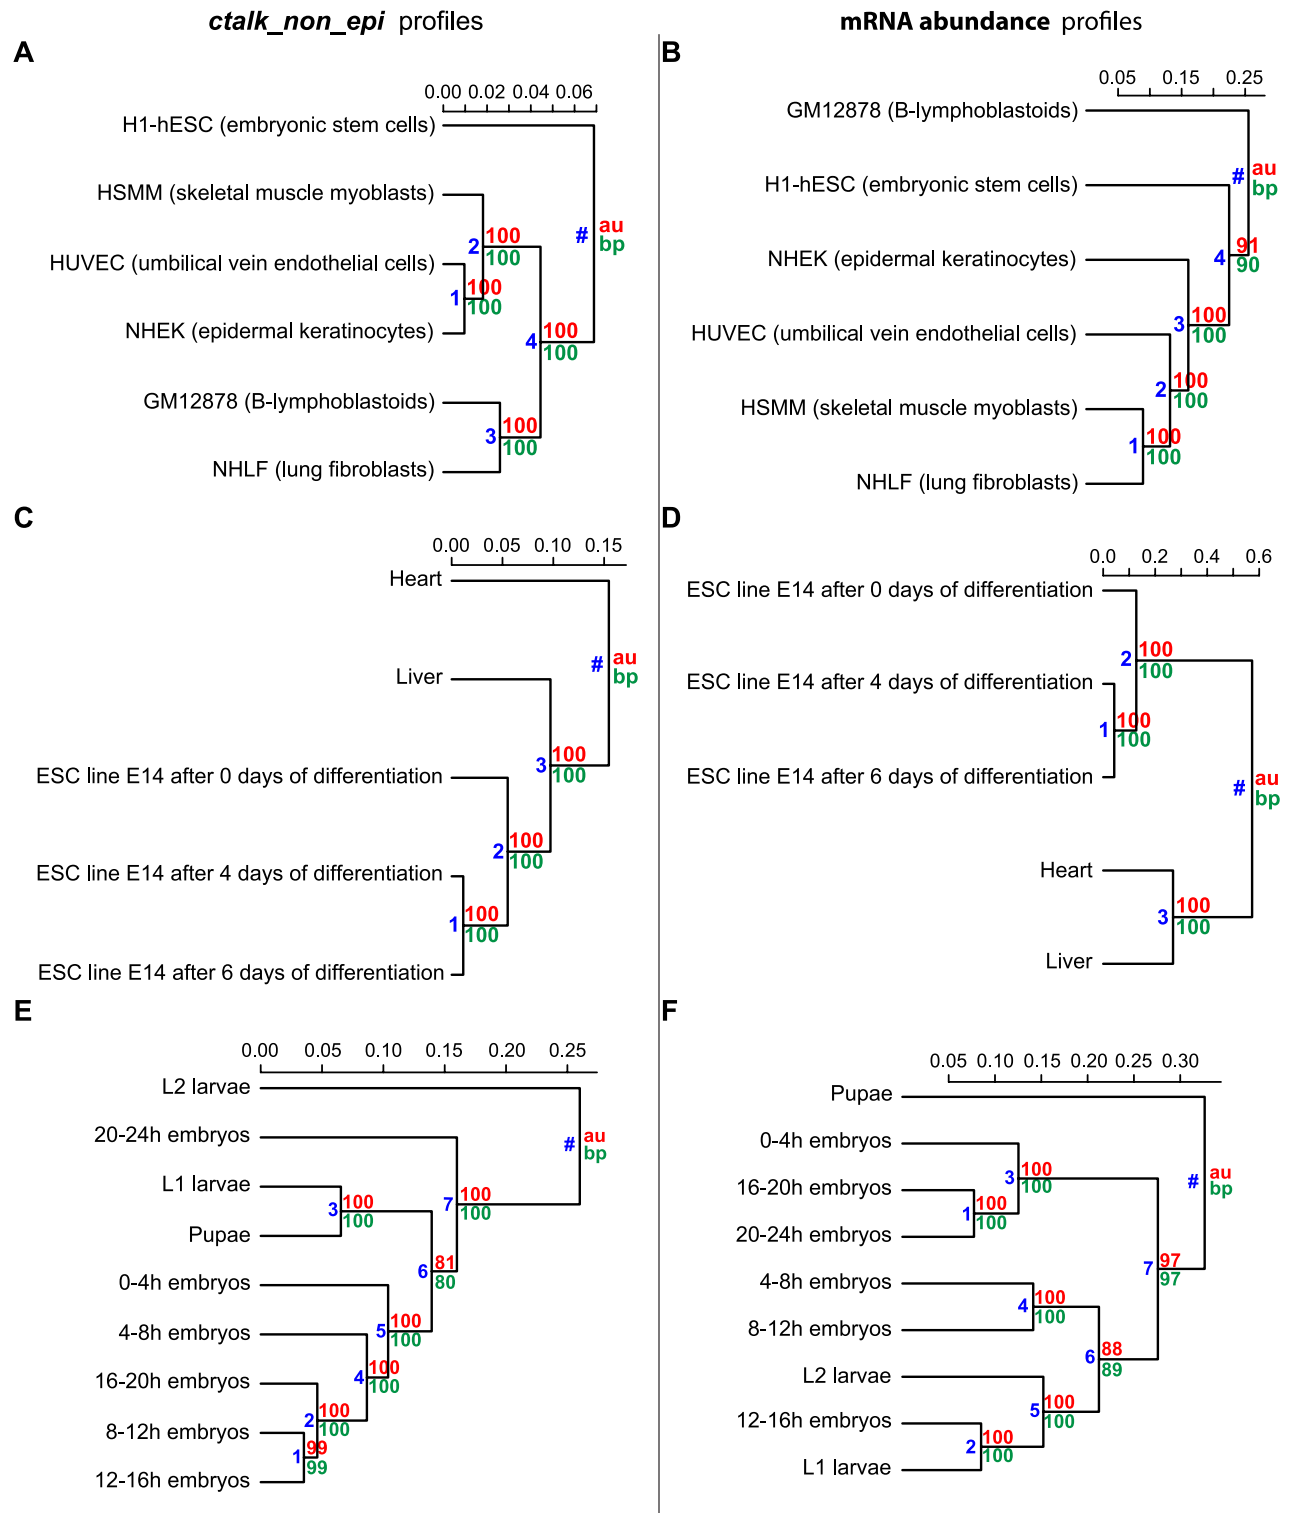

**Figure 3: Hierarchical cluster analysis of *ctalk\_non\_epi* and mRNA abundance profiles**

Organisms: *Homo sapiens* (A, B), *Mus musculus* (C, D), and *Drosophila melanogaster* (E, F).

Metric: correlation ( $1 - r$ ). Linkage method: UPGMA. Significance scores: **au** (approximately unbiased) and **bp** (bootstrap probability) [27]. Significant clusters were identified as those for which **au** and **bp**  $\geq 95$ . Cluster identification numbers are in blue.

The *ctalk\_non\_epi* profile corresponding to H1-hESC (embryonic stem cells) was identified as the most dissimilar with respect to the other profiles which, importantly, are those of differentiated cell types. For comparison and positive control, mRNA abundance profiles for the six cell types were constructed from RNA-seq data and then hierarchically clustered. As observed for the *ctalk\_non\_epi* profiles, the mRNA abundance profile corresponding to H1-hESC cells was identified as significantly dissimilar, i.e., excluded from the largest significant cluster (Figure 3B, cluster #3), although this mRNA abundance profile was excluded along with the GM12878 B-lymphoblastoids profile. These findings indicate that *ctalk\_non\_epi* profiles associate with cell differentiation states in *Homo sapiens*. Notably, in the cell types analyzed, this association was clearer than the association observed between mRNA abundance profiles and cell differentiation states.

### ***ctalk\_non\_epi* profiles associate with cell differentiation states in *Mus musculus***

The analysis for *Mus musculus* comprised five different histone H3 modifications in five cell types. The five cell type datasets analyzed were 8-weeks-adult heart, 8-weeks-adult liver, plus three datasets of E14 embryonic stem cells after zero, four, and six days of differentiation respectively. As in *Homo sapiens*, the *ctalk\_non\_epi* profiles for *Mus musculus* fell into significant clusters that associated with cell differentiation states. All three E14 *ctalk\_non\_epi* profiles fell into a significant, exclusive cluster (Figure 3C, cluster #2) and within it, the profiles corresponding to latter time points (four and six days of differentiation) fell into another significant cluster (Figure 3C, cluster #1). Additionally, the liver *ctalk\_non\_epi* profile was found to be more similar to the profiles of the least differentiated states than the heart profile (Figure 3C, cluster #3).

Mouse mRNA abundance profiles also fell into significant clusters that associated with cell differentiation states (Figure 3D, clusters #1, #2 and #3). Like *ctalk\_non\_epi* profiles, mRNA abundance profiles resolved a significant difference between the earliest time point (zero days of differentiation) and latter time points (Figure 3D, cluster #1), indicating that the well-established association between transcriptional and cell differentiation states can be verified also from the data used for *Mus musculus*. Overall, this analysis showed that the association between *ctalk\_non\_epi* profiles and cell differentiation states is also observable in *Mus musculus*.

### ***ctalk\_non\_epi* profiles associate with developmental periods and time points in *Drosophila melanogaster***

Similarly obtained to those from human and mouse data, *ctalk\_non\_epi* profiles were computed from data for six histone H3 modifications in nine periods/time points throughout *Drosophila melanogaster* development (0-4h, 4-8h, 8-12h, 12-16h, 16-20h and 20-24h embryos; L1 and L2 larval stages; pupae). As observed in human and mouse profiles, fruit fly *ctalk\_non\_epi* profiles fell into clusters that also associated strongly with the degree of cell differentiation. One significant cluster grouped *ctalk\_non\_epi* profiles of earlier developmental periods (Figure 3E, cluster #5) apart from later development profiles. Two more significant clusters grouped later time point *ctalk\_non\_epi* profiles (Figure 3E, cluster #3) and separated the L2 larvae profile (Figure 3E, cluster #7) from all other profiles.



General *ctalk\_non\_epi* cluster structure was not entirely consistent with developmental chronology as the pupae profile showed (Figure 3E, cluster #7). It must be noted however that, unlike *Homo sapiens* and *Mus musculus* data where each *ctalk\_non\_epi* profile represented a specific or almost specific differentiation state, each *Drosophila melanogaster* data set was obtained from whole specimens (embryos, larvae and pupae). Especially for later developmental stages, this implies that each *ctalk\_non\_epi* profile has to be computed from more than one partially differentiated cell type at the same developmental period, thus limiting the power of the analysis.

The mRNA abundance profiles in *D. melanogaster* yielded a general cluster structure much less consistent with developmental chronology than the *ctalk\_non\_epi* profiles. For example, the profile for 0-4h embryos fell into the same significant cluster as the profiles for 16-20h and 20-24h embryos (Figure 3F, cluster #3). Additionally, the profile for 12-16h embryos fell into the same significant cluster as the profiles for L1 and L2 larvae (Figure 3F, cluster #5). Overall, these results indicate that the association between *ctalk\_non\_epi* profiles and cell differentiation states also holds in *Drosophila melanogaster* despite the limitations of the analysis imposed by the ChIP-seq/RNA-seq source data.

## Discussion

### Beyond the obtained proof of principle

While the statistically significant association between *ctalk\_non\_epi* profiles and cell differentiation states was an immediate and critical result of the computational analysis, no less important is the nature of the constraints represented by *ctalk\_non\_epi* profiles. By definition, *ctalk\_non\_epi* profiles represent the strength and sign of pairwise partial correlations (with mRNA abundance as the control variable) computed from observed histone modification states—the same observed states that previous research has shown able to predict mRNA levels with high accuracy ( $R \sim 0.9$ ) [23]. It follows directly from these considerations that, for all three analyzed organisms within regions adjacent to transcription start sites (TSSs), histone H3 crosstalk is subject to an additional type of constraints that are stochastically independent from mRNA levels and associated with cell differentiation states. In other words, two systems, *stochastically independent* and yet *both associated to cell differentiation states*, constrain histone H3 crosstalk *at the same sites*. Whereas this corollary shows the obtained results to be highly meaningful in biological terms, any theoretical development upon it regarding differentiated multicellularity must still address outstanding fundamental questions, including (i) how the association between *ctalk\_non\_epi* profiles and cell differentiation states is actually realized in the developing organism, (ii) how the intrinsic regulation of gene expression is exerted, and (iii) how the intrinsic regulatory system emerged throughout evolution and emerges within the cell differentiation process.

### General theory of differentiated multicellularity

Based on the proof of principle obtained, I propose a general theory of differentiated multicellularity, which explains how gene expression is regulated during cell differentiation in extant multicellular lineages and how differentiated multicellular lineages emerged throughout evolution. This theory describes how two constraint-generating (also known as “self-organizing”) systems elicit an emergent transition. The first system underpins the correlation between histone modification states and transcriptional states in the cell nucleus and the second system is a specific extracellular gradient generated by cell proliferation. At certain moment these systems start to constrain each other synergistically, and the resulting emergent system is the differentiated multicellular organism as an individual, which must be understood as an intrinsic, higher-order constraint with logically consistent and scientifically-tenable teleological properties, in particular self-regulation. The theory explains how this multicellular individual is the true regulator of gene expression during cell differentiation. The theory is also falsifiable (see problems with current hypotheses in the [Appendix](#)). Although its proof of principle was obtained from high-throughput metazoan data, the theoretical description makes no assumption about a specific multicellular lineage.

To highlight the similarities of molecular dynamics and spatial topology at the most fundamental level, the theory is presented in detail in ten parts described in parallel below. Each part is described in terms of the evolution of an ancestor eukaryotic species *U* towards differentiated multicellularity and in terms of the cell differentiation process starting from the primordial cell(s) of a differentiated multicellular species *D*. Definitions and notation are listed in [Table 1](#).

**Table 1: Theoretical definitions and notation**

|                                    |                                                                                                                                                                                                                                                                                                                                                                                                                                                                    |
|------------------------------------|--------------------------------------------------------------------------------------------------------------------------------------------------------------------------------------------------------------------------------------------------------------------------------------------------------------------------------------------------------------------------------------------------------------------------------------------------------------------|
| <b>Context</b>                     | $X_{(i;t)}$ is the $i^{\text{th}}$ cell of a given organism or cell population of the eukaryotic species $X$ at a given instant $t$ . In the same logic, <i>the following concepts must be understood in instantaneous terms.</i>                                                                                                                                                                                                                                  |
| $S_E(X_{(1;t)}, \dots, X_{(n;t)})$ | <b>Extracellular space:</b> The entire space in an organism or cell population that is not occupied by its $n$ cells at a given instant $t$ . Positions in $S_E$ are specified in spherical coordinates, namely $r$ (radial distance), $\theta$ (azimuthal angle), and $\phi$ (polar angle).                                                                                                                                                                       |
| $C_W(X_{(i;t)})$                   | <b>Waddington's constraints:</b> The constraints associating certain subsets of the spatially-specified molecular nuclear phenotype of $X_{(i;t)}$ with the instantaneous transcription rates at the transcription start sites (TSSs), provided changes in these Waddington's constraints $C_W(X_{(i;t)})$ are <i>stochastically independent</i> from changes in the genomic sequence.                                                                             |
| $F_W(X_{(i;t)})$                   | <b>Waddington's embodiens:</b> The largest subset of the spatially-specified molecular nuclear phenotype of $X_{(i;t)}$ for which the Waddington's constraints $C_W(X_{(i;t)})$ are significant (e.g., histone H3 post-translational modifications in the TSS-adjacent genomic regions).                                                                                                                                                                           |
| $C_N(X_{(i;t)})$                   | <b>Nanney's constraints:</b> The constraints associating certain subsets of the spatially-specified molecular nuclear phenotype of $X_{(i;t)}$ with the Waddington's embodiens $F_W(X_{(i;t)})$ , provided changes in these Nanney's constraints $C_N(X_{(i;t)})$ are <i>stochastically independent</i> from changes in the instantaneous transcription rates at the TSSs. In this work Nanney's constraints are represented by the <i>ctalk_non_epi</i> profiles. |
| $F_N(X_{(i;t)})$                   | <b>Nanney's embodiens:</b> The largest subset of the spatially-specified molecular nuclear phenotype of $X_{(i;t)}$ for which the Nanney's constraints $C_N(X_{(i;t)})$ are significant. Crucially, histone H3 post-translational modifications in the TSS-adjacent regions—as inferable from the <a href="#">Results</a> —can be specified as Waddington's embodiens $F_W$ and <i>also</i> as Nanney's embodiens $F_N$ .                                          |
| $F_N^{\rightarrow}(X_{(i;t)})$     | <b>Nanney's extracellular propagators:</b> The subset of the entire spatially-specified molecular phenotype of $X_{(i;t)}$ that excludes Nanney's embodiens $F_N(X_{(i;t)})$ and that is (i) secreted into the extracellular space $S_E$ and (ii) capable of eliciting a change (via facilitated diffusion/signal transduction) in Nanney's embodiens $F_N$ within other cells after a certain time interval $\Delta t$ .                                          |

**Part I (Evolution): The unicellular (or undifferentiated multicellular) ancestor.**

- $U_{(i;t_{U_0})}$  is the  $i^{th}$  cell in a population of the unicellular (or undifferentiated multicellular) species  $U$  (Figure 4A, top).
- $U_{(i;t_{U_0})}$  displays Waddington's embodiars  $F_W(U_{(i;t_{U_0})})$  (e.g., histone post-translational modifications able to elicit changes in transcriptional rates) but cell differentiation is not possible.
- Certain constraints exist on Waddington's embodiars  $F_W(U_{(i;t_{U_0})})$  that are *stochastically independent* from transcriptional rates. In other words, significant Nanney's constraints  $C_N(U_{(i;t_{U_0})})$  exist.
- However, the propagation (if any) of Nanney's constraints  $C_N$  is confined to  $U_{(i;t_{U_0})}$ , i.e., Nanney's extracellular propagators  $F_N^{\rightarrow}$  do not exist in  $U_{(i;t_{U_0})}$ .

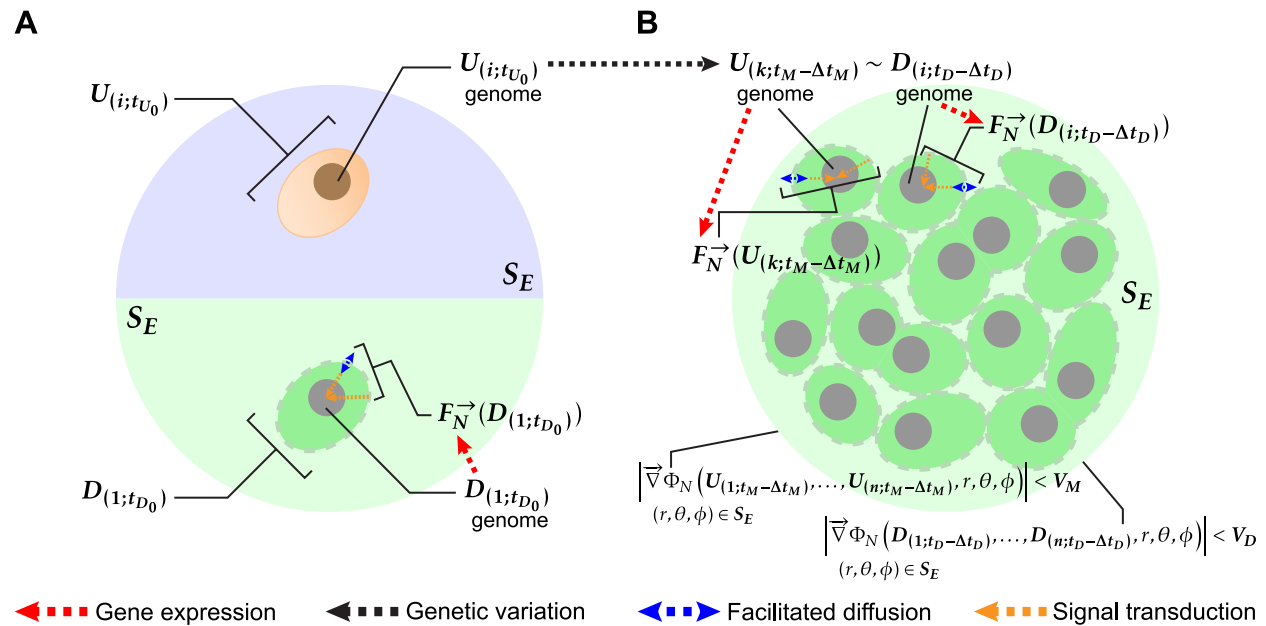

**Figure 4: Necessary initial conditions for differentiated multicellularity**

(A, top) A cell of the unicellular and undifferentiated ancestor species  $U$ . (A, bottom) A primordial cell of the multicellular species  $D$ . (A, top to B, top) The necessary genetic change for differentiated multicellularity occurs in the species  $U$ . (B, top) The similar and necessary alleles are now present in both species. (B, bottom) Cells proliferate but no significant  $\vec{\nabla} \Phi_N$  gradients form yet in  $S_E$  and no differentiation is observed.

### Part I (Ontogeny): The differentiated multicellular organism's primordial cell

- $D_{(1;t_{D_0})}$  is a primordial cell (as exemplified by zygotes, spores, or buds) of the extant differentiated multicellular species  $D$  (Figure 4A, bottom).
- Like  $U_{(i;t_{D_0})}$ ,  $D_{(1;t_{D_0})}$  displays Waddington's embodyers  $F_W(D_{(i;t_{D_0})})$  (e.g., histone post-translational modifications able to elicit changes in transcriptional rates) but cell differentiation is not observed *yet*.
- Certain constraints exist on Waddington's embodyers  $F_W(D_{(1;t_{D_0})})$  that are *stochastically independent* from transcriptional rates. In other words, significant Nanney's constraints  $C_N(D_{(1;t_{D_0})})$  exist.
- Unlike in  $U_{(i;t_{D_0})}$ , the propagation of Nanney's constraints  $C_N$  is *not* confined to  $D_{(1;t_{D_0})}$ . That is, Nanney's extracellular propagators  $F_N^{\rightarrow}$  do exist in  $D_{(1;t_{D_0})}$ .

### Part II (Evolution): Necessary novel alleles

- At some time point  $(t_M - \Delta t_M) > t_{U_0}$  during evolution the genome of certain  $U_{(k;t_M - \Delta t_M)}$  cell suffers a change (Figure 4A to 4B) such that it now synthesizes a molecule specifiable as a Nanney's extracellular propagator  $F_N^{\rightarrow}$ .
- A molecular substrate is synthesized that is membrane exchangeable and, once it enters the cell, it is also able to elicit a change in Nanney's embodyers  $F_N(U_{(i;t_{U_0})})$  (e.g., histone post-translational modifications).
- Crucially, this change is *stochastically independent* from the current gene transcriptional rates when it is elicited.
- The genetic change implies that the genome now codes for all gene products necessary for the synthesis, facilitated diffusion, and/or signal transduction of the novel Nanney's extracellular propagator(s)  $F_N^{\rightarrow}$ .
- Importantly, the novel alleles are a necessary but not sufficient condition for differentiated multicellularity (Figure 4B).

### Part II (Ontogeny): Already present necessary alleles

- At any instant  $(t_D - \Delta t_D) > t_{D_0}$  the genome of any cell  $D_{(i;t_D - \Delta t_D)}$  in the primordial cell's offspring is similar to the genome of the cell  $U_{(k;t_M - \Delta t_M)}$  (see Figure 4B, top) in that both genomes code for Nanney's extracellular propagators  $F_N^{\rightarrow}$ .
- Importantly, the alleles specified in the genome of the primordial cell  $D_{(1;t_{D_0})}$ —and in the genome of any cell in its offspring—are a necessary but not sufficient condition for cell differentiation (Figure 4B).

### Part III (Evolution & Ontogeny): Diffusion flux of Nanney's extracellular propagators and the geometry of the extracellular space $S_E$

- The existence of Nanney's extracellular propagators  $F_N^{\rightarrow}$  allows us to define a scalar field  $\Phi_N$  describing the concentration of  $F_N^{\rightarrow}$  in the extracellular space  $S_E$  and its associated concentration gradient  $\vec{\nabla}\Phi_N$  at any instant  $t$ .
- When the number of cells is small enough, diffusion flux is fast enough to overtake the spatial constraints imposed by the relatively simple geometry of  $S_E$ .
- Therefore, under these conditions the associated gradient  $\vec{\nabla}\Phi_N$  remains in magnitude—anywhere in  $S_E$ —under a certain critical value  $V_M$  for the offspring of the cell  $U_{(k;t_M-\Delta t_M)}$  and under a certain critical value  $V_D$  for the offspring of the primordial cell  $D_{(1;t_{D_0})}$  (Figure 4B, bottom).
- The constraints represented by the gradient  $\vec{\nabla}\Phi_N$  imply there is free energy available—whether or not there is cell differentiation—which, as will be described later, is in fact partially used as work in the emergence of new information content.

### Part IV (Evolution): The emergent transition to differentiated multicellularity

- At some instant  $t_M$ , later but relatively close to  $(t_M - \Delta t_M)$ , cell proliferation yields a significantly large population for which diffusion flux of Nanney's extracellular propagators  $F_N^{\rightarrow}$  is no longer able to overtake the increasing spatial constraints in the extracellular space  $S_E$ .
- Under these conditions a significant gradient, in magnitude equal or greater—anywhere in  $S_E$ —than the critical value  $V_M$  forms, i.e.,  $\left| \vec{\nabla}\Phi_N(U_{(1;t_M)}, \dots, U_{(n;t_M)}, r, \theta, \phi) \right| \geq V_M, (r, \theta, \phi) \in S_E$  (Figure 5, bottom-left).
- As a consequence, Nanney's extracellular propagators  $F_N^{\rightarrow}$  diffuse differentially into each cell, yielding unprecedented differential Nanney's constraints  $\{C_N(U_{(1;t_M)}), \dots, C_N(U_{(n;t_M)})\}$  in the cells' nuclei by virtue of no cell or gene product in particular but, importantly, of the constraints imposed by the entire proliferating cell population on the diffusion flux of  $F_N^{\rightarrow}$  in  $S_E$ .
- These differential Nanney's constraints  $C_N$  in turn elicit differential changes in Waddington's embodyers  $\{F_W(U_{(1;t_M)}), \dots, F_W(U_{(n;t_M)})\}$  within the cells' nuclei (Figure 5, top-left), thus Nanney's constraints  $C_N$  now change the instantaneous transcription rates irrespectively of how gene transcriptional changes were propagating up to that instant. This part of the theory explains as a consequence how multicellular lineages, displaying self-regulated changes in gene expression during ontogeny, evolved.

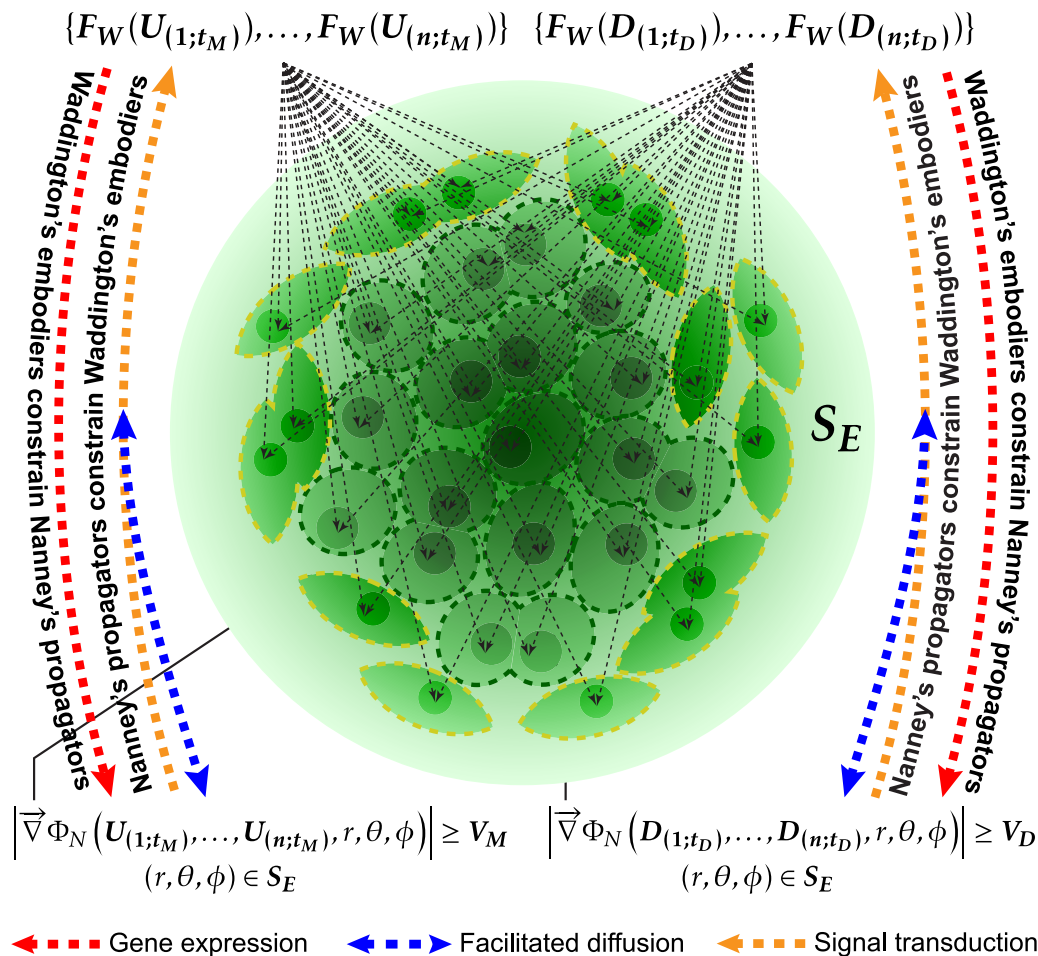

**Figure 5: Emergent transition to differentiated multicellularity and to cell differentiation**

Intrinsic higher-order constraint emerges when significant gradients  $\vec{\nabla}\Phi_N$  couple the lower-order Nanney's constraints  $C_N$  and Waddington's constraints  $C_W$  synergistically across  $S_E$ . Waddington's embodiars  $F_W$  (top) constrain—via gene expression (red dashed arrows)—the facilitated diffusion/signal transduction of Nanney's extracellular propagators  $F_N$  in a differential and *stochastically independent* manner. In turn, Nanney's extracellular propagators  $F_N$  in the gradients  $\vec{\nabla}\Phi_N$  (bottom) constrain—after their facilitated diffusion/signal transduction (blue and orange dashed arrows)—Waddington's embodiars  $F_W$ , and as a consequence, also constrain transcription rates and gene expression levels in a differential and *stochastically independent* manner.

#### Part IV (Ontogeny): The emergent transition to cell differentiation

- At some instant  $t_D$ , later but relatively close to  $(t_D - \Delta t_D)$ , embryonic growth yields certain number of undifferentiated cells for which diffusion flux of Nanney's extracellular propagators is no longer able to overtake the increasing spatial constraints in the extracellular space  $S_E$ .
- Under these conditions a significant gradient forms, in magnitude equal or greater—anywhere in  $S_E$ —than the critical value  $V_D$ , i.e.,  $|\vec{\nabla}\Phi_N(D(1;t_D), \dots, D(n;t_D), r, \theta, \phi)| \geq V_D, (r, \theta, \phi) \in S_E$  (Figure 5, bottom-right).

- As a consequence, Nanney's extracellular propagators  $F_N^{\rightarrow}$  diffuse differentially into each cell, yielding unprecedented differential Nanney's constraints  $\{C_N(D_{(1;t_D)}), \dots, C_N(D_{(n;t_D)})\}$  in the cells' nuclei by virtue of no cell or gene product but because of the constraints imposed by the entire growing embryo on the diffusion flux of Nanney's extracellular propagators in the extracellular space  $S_E$ .
- These differential Nanney's constraints  $C_N$  in turn elicit differential changes in Waddington's embodiars  $\{F_W(D_{(1;t_D)}), \dots, F_W(D_{(n;t_D)})\}$  within the cells' nuclei (Figure 5, top-right), thus Nanney's constraints  $C_N$  now change the instantaneous transcription rates irrespectively of how gene transcriptional changes were propagating up to that instant. This part of the theory explains as a consequence how undifferentiated cells start to differentiate, displaying self-regulated changes in gene expression during ontogeny.

### Part V (Evolution): What was the evolutionary breakthrough?

- Since the oldest undisputed differentiated multicellular organisms appear in the fossil record around 2.8 billion years after the first stromatolites [28], the necessary genetic change from the genome of the cell  $U_{(i;t_{U_0})}$  to the genome of the cell  $U_{(k;t_M-\Delta t_M)}$  can be safely regarded as a highly improbable step.
- The major evolutionary breakthrough was not genetic but instead the unprecedented dynamical regime emerging from proliferating eukaryote cells at  $t_M$ , or in more general terms at  $\{t_{M_1}, \dots, t_{M_n}\}$  throughout evolution since extant differentiated multicellular organisms constitute a paraphyletic group [29, 30].
- This novel dynamical regime emerges as a higher-order constraint from the synergistic coupling of the lower-order Waddington's constraints  $C_W$  and Nanney's constraints  $C_N$ , able now to propagate through the extracellular space  $S_E$  (Figure 5, dashed arrows).
- Although dependent on the novel alleles in the genome of  $U_{(k;t_M-\Delta t_M)}$  to emerge given enough cell proliferation, this system is not a network of molecular mechanisms—however complex. Instead, it is a particular example of the generic *teleodynamic system*, proposed by Terrence Deacon in his *emergent dynamics* theory [31], which emerges when certain specific conditions are met and *then* is subject to and shaped by natural selection. In this context, environmental constraints such as oxygen availability [32] and even gravity (see Corollary #5) filter out specific emergent multicellular dynamics that are incompatible with those constraints.
- In summary, the critical evolutionary novelty was the unprecedented multicellular individual or multicellular *self*, which can be described as an intrinsic, higher-order constraint that emerges spontaneously from a particular class of proliferating eukaryotic cells. Being an intrinsic, higher-order *constraint*, this multicellular *self* is causally-efficacious when regulating its intrinsic dynamics or its surroundings.



## Part V (Ontogeny): *Who is regulating cell differentiation?*

- Contrary to what could be derived from Alan Turing's approach [33], the theory hereby proposed does *not* regard the significant proliferation-generated extracellular gradient, i.e.,  $|\vec{\nabla}\Phi_N| \geq V_D$  (anywhere in  $S_E$ ), as the fundamental regulator of the cell differentiation process.
- Whereas differential Nanney's constraints  $\{C_N(D_{(1;t_D)}), \dots, C_N(D_{(n;t_D)})\}$  are *regulatory constraints* with respect to Waddington's embodyers  $\{F_W(D_{(1;t_D)}), \dots, F_W(D_{(n;t_D)})\}$  as described in [Part IV-Ontogeny](#) (see [Figure 5](#), blue/orange dashed arrows), the reciprocal proposition is also true. Namely, Waddington's constraints  $\{C_W(D_{(1;t_D)}), \dots, C_W(D_{(n;t_D)})\}$  are *stochastically independent* from Nanney's constraints, thus Waddington's constraints  $C_W$  are in turn *regulatory constraints* with respect to Nanney's extracellular propagators  $\{F_N^{\rightarrow}(D_{(1;t_D)}), \dots, F_N^{\rightarrow}(D_{(n;t_D)})\}$ , e.g., changes in the expression of the protein channels, carriers or membrane receptors necessary for the facilitated diffusion/signal transduction of Nanney's extracellular propagators ([Figure 5](#), red dashed arrows).
- *Consequently, only if the stochastically independent Waddington's constraints  $C_W$  and Nanney's constraints  $C_N$  become synergistically coupled* ([Figure 5](#), dashed arrows) *across the extracellular space  $S_E$ , true intrinsic regulation on the cell differentiation process is possible.*
- This corollary implies in turn that both chromatin states and transcriptional states are reciprocally cause and effect with respect to each other. This regime, intuitively describable as "chicken-egg" dynamics, is characteristic of teleodynamic systems and teleodynamic systems only.
- The true regulator of the cell differentiation process is then the developing multicellular organism itself. This is because the multicellular organism *is* the intrinsic and causally-efficacious higher-order *constraint* emerging from and regulating *ipso facto* Nanney's constraints  $C_N$  and Waddington's constraints  $C_W$  (when coupled synergistically coupling of across the extracellular space  $S_E$ ) gene expression and the exchange of Nanney's extracellular propagators  $F_N^{\rightarrow}$  in what would be otherwise an arbitrarily complex population or colony unicellular eukaryotes.

## Part VI (Evolution): Unprecedented multicellular dynamics

- Once the necessary alleles for differentiated multicellularity are present in some eukaryotic lineages (see [Part II-Evolution](#)), further variation due to phenomena like mutation, gene duplication or alternative splicing make possible the emergence of a plethora of novel (teleodynamic) multicellular regimes.
- Moreover, the dependence of differentiated multicellularity on one or more coexisting  $\vec{\nabla}\Phi_N$  gradients (i.e., constraints on diffusion flux) in  $S_E$ , which depend on no cell in particular but on the entire cell population or embryo, yields an important implication in evolutionary terms. That is, since a higher-order constraint is taking over the regulation of changes in gene expression within individual cells, it is predictable that said cells lose some cell-intrinsic systems that were critical at a time when eukaryotic life was only unicellular, even when compared to their prokaryotic counterparts.

- In this context a result obtained over a decade ago acquires relevance: in a genome-wide study it was found that the number of transcription factor genes increases as a power law of the total number of protein coding genes, with an exponent greater than 1 [34]. In other words, the need for transcription-factor genetic information increases faster than the total amount of genes it is involved in regulating. Intriguingly, the eukaryotes analyzed were the group with the smallest power-law exponent. This means that the most complex organisms require proportionally *less* transcription-factor information. With data available today [35], a reproduction I conducted of the aforementioned analysis allowed a robust confirmation: the power-law exponent for unicellular or undifferentiated multicellular eukaryotes is  $1.33 \pm 0.31$  (based on 37 genomes, data not shown). For differentiated multicellular eukaryotes is  $1.11 \pm 0.18$  (67 genomes). The loss of lower-order, cell-intrinsic regulatory systems in differentiated multicellular organisms described in the previous paragraph—in turn accounted for by the emergence of higher-order information content (see [Part IX](#))—explains these otherwise counterintuitive differences in power-law exponents.

#### **Part VI (Ontogeny): What does ontogeny recapitulate?**

- As the key to the evolution of any multicellular lineage displaying self-regulated changes in gene expression during cell differentiation, the proposed theory holds the emergent transition, spontaneous from cell proliferation shortly after Nanney's extracellular propagators  $F_N^{\rightarrow}$  began to be synthesized and exchanged through the cells' membrane.
- Therefore, my theoretical description rejects the hypothesis that metazoans—or, in general, any multicellular lineage displaying self-regulated cell differentiation—evolved from gradual specialization of single-cell colonies or aggregations [36, 37, 38, 30, 39, 40, 41, 42].
- However, this rejection does not imply that precedent traits (e.g., cell-cell adhesion) were unimportant for the later fitness of differentiated multicellular organisms.
- Haeckel's famous assertion is not rejected completely: in every extant multicellular lineage, this self-sufficient, self-repairing, self-replicating, and self-regulating system emerges over and over again from undifferentiated cells and presents itself to natural selection ever since its evolutionary debut. Therefore, in this single yet most fundamental sense, ontogeny does recapitulate phylogeny.

#### **Part VII (Evolution & Ontogeny): The role of epigenetic changes**

- Contrary to what the epigenetic landscape framework entails, under this theory the heritable changes in gene expression do not define, let alone explain, the intrinsic regulation of cell differentiation.
- The robustness, heritability, and number of cell divisions, which any epigenetic change comprises, are instead *adaptations* of the intrinsic, higher-order constraint emergent from proliferating individual cells (i.e., the multicellular organism).
- These adaptations have been shaped by natural selection after the emergence of each extant multicellular lineage and are in turn reproduced, eliminated, or replaced by novel adaptations in every successful ontogenetic process.

## Part VIII (Evolution & Ontogeny): Novel cell types, tissues and organs evolve and develop

- Further genetic variation in the novel alleles in the genome of the cell  $U_{(k;t_M-\Delta t_M)}$  or the already present alleles in the genome of the  $D_{(1;t_{D_0})}$  (e.g., mutation, gene duplication, alternative splicing) imply that one or more than one  $\{\vec{\nabla}\Phi_{N_1}, \dots, \vec{\nabla}\Phi_{N_k}\}$  gradients emerge in  $S_E$  with cell proliferation.
- A cell type  $T_j$  will develop then in a region  $S_{E_i}$  of the extracellular space  $S_E$  when a relative uniformity of Nanney's extracellular propagators is reached, i.e.,  $\left(\left|\vec{\nabla}\Phi_{N_1;T_j}\right|, \dots, \left|\vec{\nabla}\Phi_{N_k;T_j}\right|\right) < \left(V_{N_1;T_j}, \dots, V_{N_k;T_j}\right), (r, \theta, \phi) \in S_{E_i}$ , where  $\left(V_{N_1;T_j}, \dots, V_{N_k;T_j}\right)$  are certain critical values (see a two-cell-type and two-gradient depiction in Figure 6).
- As highlighted earlier, cell differentiation is not *regulated* by these gradients themselves but by the intrinsic, higher-order constraint emergent from the synergistic coupling of Waddington's constraints  $C_W$  and Nanney's constraints  $C_N$  across  $S_E$ .
- This constraint synergy can be exemplified as follows: gradients  $\{\vec{\nabla}\Phi_{N_1}, \dots, \vec{\nabla}\Phi_{N_k}\}$  can elicit changes in gene expression in a number of cells, which in turn may promote the dissipation of the gradients (e.g., by generating a surrounding membrane that reduces dramatically the effective  $S_E$  size) or may limit further propagation of those gradients from  $S_E$  into the cells (e.g., by repressing the expression of genes involved in the facilitated diffusion/signal transduction of  $F_N^{\rightarrow}$  in  $S_E$ ).
- Thus, under this theory, cell types, tissues, and organs evolved sequentially as “blobs” of relative  $F_N^{\rightarrow}$  uniformity in regions  $\{S_{E_1}, \dots, S_{E_n}\}$  (i.e., regions of relatively small  $\vec{\nabla}\Phi_N$  magnitude) within  $S_E$  displaying no particular shape or function—apart from being compatible with the multicellular organism's survival and reproduction—by virtue of genetic variation (involved in the embodiment and propagation of Nanney's constraints  $C_N$ ) followed by cell proliferation.
- Then, these  $F_N^{\rightarrow}$ -uniformity “blobs” were shaped by natural selection from their initially random physiological and structural properties to specialized cell types, tissues, and organs. Such specialization evolved towards *servicing* the emergent intrinsic higher-order constraint proposed here as being the multicellular organism itself. The result of this emergence-selection process is observable in the dynamics characterizing the ontogeny of extant multicellular species.

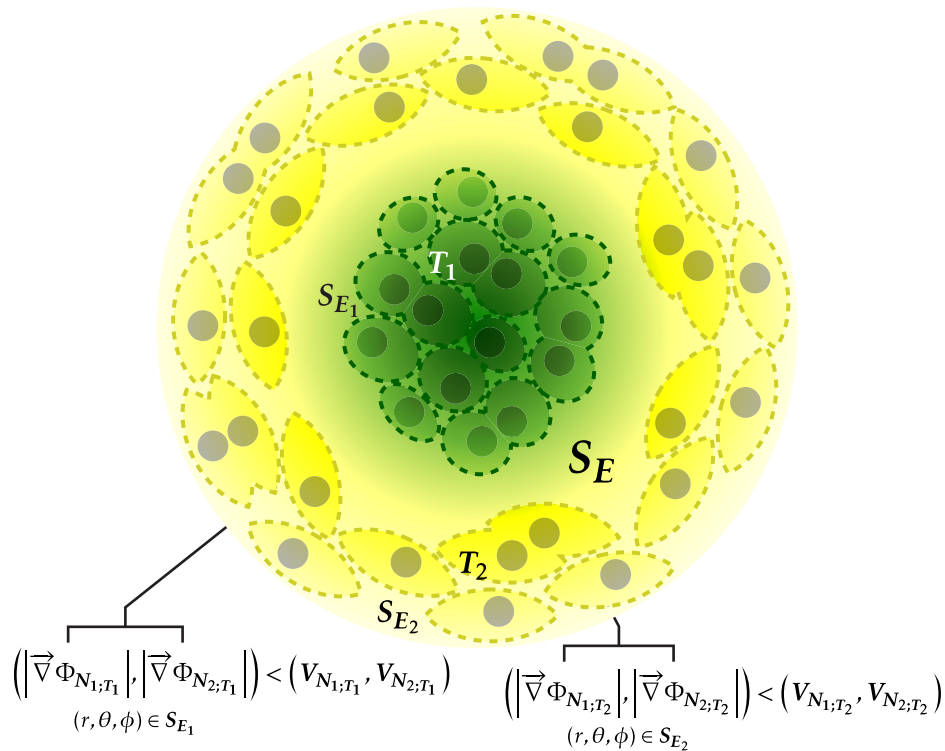

**Figure 6: Novel cell types develop**

Two distinct cell types  $T_1$  and  $T_2$  develop respectively in regions  $S_{E_1}$  and  $S_{E_2}$  within  $S_E$  characterized by a relative small  $\vec{\nabla} \Phi_N$  gradient magnitude, i.e., in extracellular regions of relative  $F_N \vec{\nabla}$  uniformity.

### Part IX (Evolution & Ontogeny): Emergent *hologenic* information and multicellular self-repair

- A significant amount of information content has to *emerge* to account for robust and reproducible cell fate decisions and for the self-regulated dynamics of cell differentiation in general.
- Under this theory, this content emerges when the significant gradient or gradients  $\{\vec{\nabla} \Phi_{N_1}, \dots, \vec{\nabla} \Phi_{N_k}\}$  form at some point from proliferating undifferentiated cells, coupling synergistically Nanney’s constraints  $C_N$  and Waddington’s constraints  $C_W$  across  $S_E$ .
- Crucially, this information is *not* about any coding sequence and its relationship with cell-intrinsic and cell-environment dynamics (i.e., genetic information) nor about any heritable gene expression level/profile and its relationship with cell-intrinsic and cell-environment dynamics (i.e., epigenetic information).
- Instead, this information is about the multicellular organism as a whole, understood as the emergent higher-order intrinsic constraint described previously, and also about the environmental constraints under which this multicellular organism develops. For this reason, I propose to call this emergent information *hologenic* (ὅλος is the ancient Greek for “whole” or “entire”; the suffix -genic may denote “producing” or “produced by”, which are both true in this theory as will be shown next).

- No less importantly, at each instant the multicellular organism is not only interpreting hologenic information—by constraining its development into specific trajectories since its emergence given the current  $\{\vec{\nabla}\Phi_{N_1}, \dots, \vec{\nabla}\Phi_{N_k}\}$  gradients in  $S_E$ —but also actively generating novel hologenic information, e.g., when its very growth and the morphological changes in its differentiating cells modify those gradients. These “chicken-egg” dynamics are similar to those described in [Part V-Ontogeny](#) because they are underpinned by the same logic of constraint reciprocity (i.e., a teleodynamic relationship [31]).
- Thus, in the most fundamental sense, *cell differentiation is an interpretive process*, not the replication or inheritance of any molecular “code”, as David L. Nanney had indirectly anticipated [20]; its *defining interpreter of information*—endogenous such as hologenic information or exogenous such as that in royal jelly feeding [5])—*is the developing organism itself*.
- The subset of the molecular phenotype that conveys hologenic information is not only the subset involved in the gradients  $\{\vec{\nabla}\Phi_{N_1}, \dots, \vec{\nabla}\Phi_{N_k}\}$  but the entire subset embodying or propagating Nanney’s constraints  $C_N$ .
- Hologenic information content is “absent” by virtue of intrinsic constraints: hologenic content is not in the molecular substrates conveying that content anymore than the content of this theory is in integrated circuits, computer displays, paper, or even in the complex neural interactions within the reader’s brain. *The previously realizable states that become constrained or made “absent” in the dynamics of the multicellular organism by the synergistic coupling of Waddington’s constraints  $C_W$  and Nanney’s constraints  $C_N$  across  $S_E$  is the content of hologenic information*; the substrates embodying and propagating the critical constraints for the coupling can only *then* be identified as conveying hologenic information.
- Additionally, since the gradients  $\{\vec{\nabla}\Phi_{N_1}, \dots, \vec{\nabla}\Phi_{N_k}\}$  conveying hologenic information depend on no cell in particular but on the spatial constraints imposed by the entire cell population or embryo, cell differentiation will be robust with respect to moderate perturbations such as some cell loss.

## Part X (Ontogeny): Ontogeny ends and cell differentiation “terminates”

- If under this theory cell differentiation emerges with the proliferation of (at the beginning, undifferentiated) cells, why should it terminate for any differentiation lineage? What is this “termination” in fundamental terms? These are no trivial questions. As an answer to the first, zero net proliferation begs the fundamental question; to the second, a “fully differentiated” condition fails to explain the existence of adult stem cells. To address these issues three considerations are most important:

- (i) For any cell or group of cells the molecules specifiable as Nanney's extracellular propagators  $F_N^{\rightarrow}$  at any instant  $t$  may not be specifiable as such at some later instant  $t + \Delta t$ .
- (ii) The emergent *telos* or "end" in this theory is the instantaneous, higher-order intrinsic constraint that emerges from proliferating undifferentiated cells (i.e., the multicellular *self*); not the "intuitive" *telos* described in the introduction—such as the organism's mature form, a fully differentiated cell, or certain future transcriptional changes to achieve such states—the "intuitive" *telos* is logically inconsistent, because such a *telos* entails the causal power of future events on events preceding them.
- (iii) This causally-efficacious, intrinsic, higher-order constraint emerges from the synergistic coupling of lower-order Waddington's constraints  $C_W$  and Nanney's constraints  $C_N$  across the extracellular space  $S_E$ .
  - Therefore, under this theory, cell differentiation "terminates" in any given region  $S_{E_i}$  of the extracellular space if a stable or metastable equilibrium is reached where at least one of the two following conditions is true:
    - (a) The gradients  $\{\vec{\nabla}\Phi_{N_1}, \dots, \vec{\nabla}\Phi_{N_k}\}$  dissipate in  $S_{E_i}$  under certain critical values, i.e.,  $\left(\left|\vec{\nabla}\Phi_{N_1}\right|, \dots, \left|\vec{\nabla}\Phi_{N_k}\right|\right) < (V_{D_1}, \dots, V_{D_k}), (r, \theta, \phi) \in S_{E_i}$  (Figure 7B, left).
      - Condition (a) can be reached for example when development significantly changes the morphology of the cells by increasing their surface-to-volume ratio, because such increase removes spatial constraints in  $S_{E_i}$  that facilitate the emergence/maintenance of the gradients.
      - Thus, under this theory, one can predict a *significant positive correlation between the degree of differentiation of a cell and its surface-to-volume ratio and also a significant negative correlation between cell potency/regenerative capacity and that ratio*, once controlling for cell characteristic length.
    - (b) The gradients  $\{\vec{\nabla}\Phi_{N_1}, \dots, \vec{\nabla}\Phi_{N_k}\}$  are unable to constrain Waddington's embodiars  $F_W$  in the cells' nuclei because the critical gene products (protein channels/carriers or signal transducers) are non-functional or not expressed, i.e., the cells become "blind" to the gradients (Figure 7B, right).
      - Condition (b) can be reached when the cell differentiation process represses at some point the expression of the protein channels or carriers necessary for the facilitated diffusion/signal transduction of the *current* Nanney's extracellular propagators  $F_N^{\rightarrow}$ .
      - Importantly, the stability of the equilibrium will depend on the cells' currently expressed phenotype. Thus, an adult multipotent or pluripotent stem cell may differentiate if needed [43] or some differentiated cells may dedifferentiate given certain stimuli [44] (metastable equilibrium), whereas a fully differentiated neuron does not (very stable equilibrium).

- These examples underscore that the *telos* of cell differentiation is not a “fully differentiated” state but, as this theory explains, the instantaneous, intrinsic higher-constraint, which is the multicellular organism as a whole. Consequently, the “termination” of cell differentiation should be understood rather as an indefinite-as-long-as-functional stop, or even as apoptosis.
- The multicellular *telos* described will prevail in ontogeny (and did prevail in evolution) as long as an even higher-order *telos* does not emerge from it.

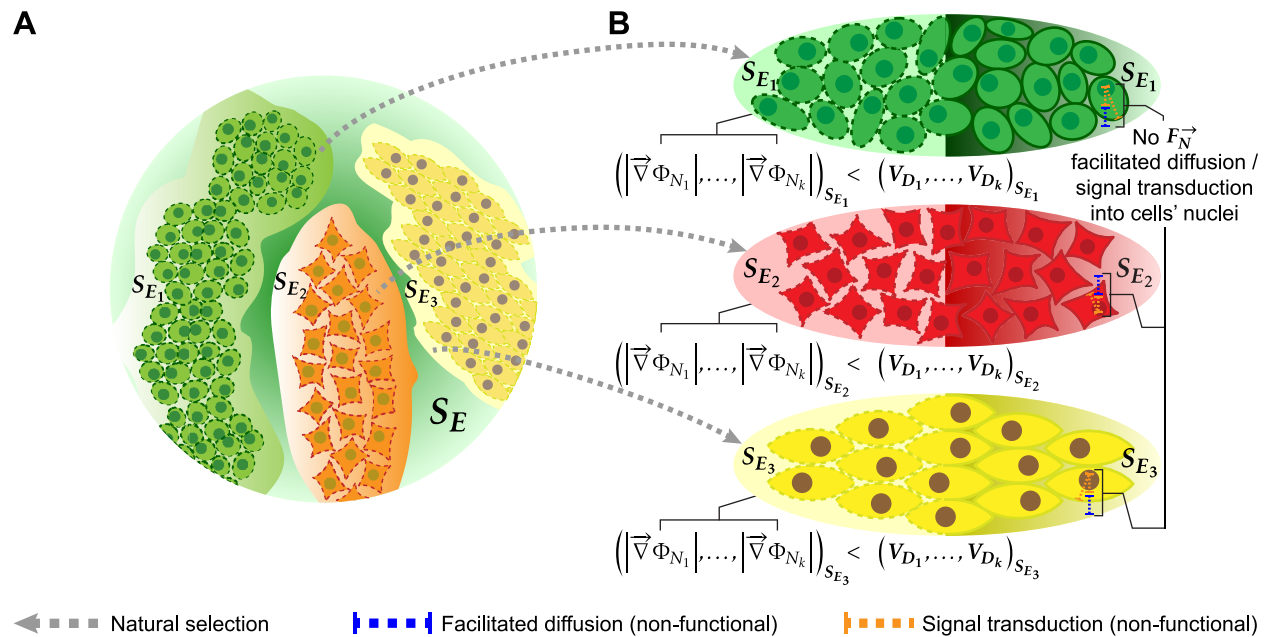

**Figure 7: The evolution of cell differentiation and its “termination” during ontogeny**

(A) Cell types/tissues/organs evolve as emergent “blobs” of relatively small  $\nabla\Phi_N$  magnitude and then are shaped by natural selection. (B) Cell differentiation stops when the  $\nabla\Phi_N$  gradients dissipate (left), or when they cannot diffuse/be transduced into the cells’ nuclei (right).

### Part X (Evolution): The evolutionarily-shaped multicellular *telos*

- Whereas the causal power of the organism’s mature form as ontogenetic *telos* is logically inconsistent, the assumption that the primordial cell is a complete developmental blueprint containing all necessary information for the process is also untenable.
- In contrast, ontogeny is, under this theory, an emergent, evolutionarily-shaped and instantaneously-defined (i.e., logically consistent) teleological process. The reason why it intuitively appears to be “directed” to and by the organism’s mature form is that the intrinsic higher-order constraint—the true (instantaneous) *telos* described previously—and the hologenic information content emerging along with it, are exerting efficacious causal power on the ontogenetic process.

- Although the propagation of constraints within this process, such as propagated changes in gene expression, is decomposable into molecular interactions, its “end-directed” causal power in self-regulation is *not* because the *telos* or “end” (see [Figure 1, top right](#)) is a spontaneous, intrinsic higher-order constraint or “dynamical analogue of zero” emergent from lower-order constraints, as first argued by T. Deacon [31]. Therefore, this teleological causal power cannot be mechanistically reduced or decomposed into molecules and their interactions.
- Evolution has selected the content of hologenic information (from the initial “blobs” of relative  $F_N^{\rightarrow}$  uniformity in  $S_E$ , see [Figure 7A](#)) by capturing the lower-order genetic constraints it is ultimately emergent from, not any particular molecules as media for their embodiment, media that should be regarded in this context as *means* to the multicellular *telos*. This explanation also implies a trade-off between cell independence and cell phenotypic complexity: the multicellular *telos* offloads regulatory work/constraints the cells were performing individually (as described in [Part VI-Evolution](#)), allowing them to use that free energy surplus in more complex and differentiated dynamics but also making them more dependent on that multicellular *telos*.
- In this context, the necessary genetic change from the genome of the cell  $U_{(i;t_{U_0})}$  to the genome of the cell  $U_{(k;t_M-\Delta t_M)}$  (described in [Part II-Evolution](#)) could well have been significantly smaller in terms of DNA or protein sequence than other genetic changes suffered by the eukaryotic ancestors of  $U_{(k;t_M-\Delta t_M)}$  while never leaving unicellularity or undifferentiated multicellularity. In general, accounting for substantial differences in the phenotype and its properties given comparatively small genetic changes is bound to be an intractable task if one or more teleodynamic transitions during evolution are involved but ignored.
- The description for the evolution of cell types, tissues and organs based on initial “blobs” of relative  $F_N^{\rightarrow}$  uniformity in  $S_E$  together with the predicted positive correlation between degree of cell differentiation and cell surface-to-volume ratio suggest an additional and more specific evolutionary implication:
  - The high surface-to-volume ratio morphology needed for neuron function was only to be expected as a trait of highly differentiated cells in the evolution of multicellularity, provided no rigid wall impedes the tinkering with substantial increases of the cells’ surface-to-volume ratio.
  - Together with the predicted negative correlation between cell potency and surface-to-volume ratio, this caveat suggests that if a multicellular lineage is constrained to display low cell surface-to-volume ratios, cell potency and regenerative capacity will be higher. These multicellular lineages can be expected to have a comparatively lower complexity but longer lifespan and/or more robustness to extrinsic damage, e.g., the plant lineage.



The synergy in the coupling of Waddington's constraints  $C_W$  and Nanney's constraints  $C_N$  across  $S_E$  described in this theory does not preclude that cell differentiation may display phases dominated by proliferation and others dominated by differentiation itself: whereas significant gradients of Nanney's extracellular propagators  $F_N^{\rightarrow}$  in  $S_E$  emerge at some point given enough cell proliferation, it is also true that the exchange of such propagators between the cells and  $S_E$  is constrained by the dynamics of facilitated diffusion and/or ligand-receptor binding which are saturable. Any representative simulation of cell differentiation according to this theory, however simple, will depend on an accurate modeling of the lower-order constraints it emerges from.

The proposed theory also encompasses syncytial stages of development, where cell nuclei divide in absence of cytokinesis, such as in *Drosophila*). In such stages, Nanney's extracellular propagators have to be operationally redefined as Nanney's *extranuclear* propagators, while still maintaining their fundamental defining property: the ability to elicit changes in Nanney's embodiars  $F_N$  inside the nucleus. Related to this theory, evidence has already been found for tissue migration across a migration-generated chemokine gradient in zebrafish [45, 46].

Two relevant simplifications or approximations were applied in my computational analysis: gene expression levels were represented theoretically by instantaneous transcription rates, which in turn were approximated by mRNA abundance in the analysis. These steps were justified because (i) the correlation between gene expression and mRNA abundance has been clearly established as positive and significant in spite of the limitations of the techniques available [47, 48], (ii) *ctalk\_non\_epi* profiles remain unchanged if gene expression can be accurately expressed as a linear transformation of mRNA abundance as the control variable, and, (iii) the association between *ctalk\_non\_epi* profiles and cell differentiation states is robust with respect to these simplifications and approximations.

If the theory advanced here resists falsification attempts consistently, further research will be needed to identify the cell-and-instant-specific Nanney's extracellular propagators  $F_N^{\rightarrow}$  at least for each multicellular model organism, and also to identify the implications (if any) of this theory on other developmental processes such as in aging or in diseases such as cancer. Also, more theoretical development will be needed to quantify the capacity and classify the content of hologenic information that emerges along with cell differentiation.

The critique of the epigenetic landscape approach, however, presented in the introduction (in terms of its assumed ability to explain the self-regulatory dynamics of cell differentiation) is completely independent from a potential falsification of the theory. I argue that if future research keeps on elucidating the mechanisms propagating changes in gene expression to an arbitrarily high level of detail while failing to recognize that the constraints that regulate such propagation must be stochastically independent from it, advances in the fundamental understanding of the evolution and self-regulatory dynamics of differentiated multicellularity will be limited.

## Falsifiability

For the presented theory, Popper's criterion of falsifiability will be met by providing the three following experimentally-testable predictions:

1. Under the proposed theory, the gradient  $\vec{\nabla}\Phi_N$  in the extracellular space  $S_E$  such that  $\left|\vec{\nabla}\Phi_N(D_{(1;t_D)}, \dots, D_{(n;t_D)}, r, \theta, \phi)\right| \geq V_D, (r, \theta, \phi) \in S_E$  is a necessary condition for the emergence of cell differentiation during ontogeny. It follows directly from this proposition that *if undifferentiated stem cells or their differentiating offspring are extracted continuously from a developing embryo at the same rate they are proliferating*, then at some instant  $t_D + \Delta t$  the significant gradient (if any) of Nanney's extracellular propagators in  $S_E$  will dissipate by virtue of the Second Law of thermodynamics, reaching everywhere values under the critical value, i.e.,  $\left|\vec{\nabla}\Phi_N(D_{(1;t_D+\Delta t)}, \dots, D_{(n;t_D+\Delta t)}, r, \theta, \phi)\right| < V_D, (r, \theta, \phi) \in S_E$ . Thus, as long as cells are extracted, *the undifferentiated cells will not differentiate or the once differentiating cells will enter an artificially-induced diapause or developmental arrest*. A proper experimental control will be needed for the effect of the cell extraction technique itself, in terms of applying the technique to the embryo but extracting no cells.
2. *A significant positive correlation will be observed between the overall cell-type-wise dissimilarity of Nanney's constraints  $C_N$  in an embryo and developmental time*. In practical terms, totipotent cells can be taken from early-stage embryos and divided into separate samples, and for each later developmental time point groups of cells can be taken (ideally according to distinguishable cell types or differentiated regions) from the embryos and treated as separate samples. Then, ChIP-seq on histone H3 modifications and RNA-seq on mRNA can be used to obtain the corresponding *ctalk\_non\_epi* profile, which represent Nanney's constraints  $C_N$  with histone H3 modifications (adjacent to TSSs) as embodyers, for each sample. If the extraction or sectioning technique is able to generate samples for ChIP-seq/RNA-seq with high cell-type specificity and the computational analysis fails to verify the predicted correlation, the theory proposed here should be regarded as falsified.
3. *If any molecule  $M$  (i) is specifiable as a Nanney's extracellular propagator  $F_N^{\vec{}}$  during a certain time interval for certain cells of a differentiated multicellular species  $D$  (see [Corollary #1](#)) and (ii) is also synthesized by a unicellular (or undifferentiated multicellular) eukaryote species  $U$ , then experiments will fail to specify  $M$  as a Nanney's extracellular propagator  $F_N^{\vec{}}$  for the species  $U$ .*

## Corollaries

Corollaries, hypotheses and predictions (not involving falsifiability) that can be derived from the proposed theory include:

**1. Nanney's extracellular propagators.** The strongest prediction that follows from the theory is *the existence of Nanney's extracellular propagators  $F_N^{\vec{}}$  in any differentiated multicellular species*. Since these propagators are instantaneously defined, their identification should be in the form “molecule  $M$  is specifiable as a Nanney's extracellular propagator of the species  $D$  in the cell, cell population, or cell type  $T_j$  at the developmental time point  $t$  (or the differentiation state  $s$ )”. This will be verified if, for instance, an experiment shows that the *ctalk\_non\_epi* profiles in these  $T_j$  cell or cells vary significantly when exposed to differential concentrations of  $M$  in the extracellular medium. If this is the case, it is also predictable that  $M$  will be synthesized by the cells *in vivo* at a relatively constant rate (at least as long as  $M$  is specifiable as  $F_N^{\vec{}}$ ). Importantly, there is no principle in this theory precluding a first messenger molecule  $M$  known to elicit transcriptional-rate changes (e.g., a well-known morphogen) from being also specifiable as a Nanney's extracellular propagator  $F_W^{\vec{}}$ . In other words, rather than the existence of a previously undescribed molecule, what will be verified is the ability of some secreted molecules to elicit changes in Nanney's constraints  $C_N$  in the cells' nuclei. One such example would be eliciting changes in histone H3 crosstalk in TSS-adjacent genomic regions irrespectively of what the transcriptional rates are. Note: although the existence of these Nanney's extracellular propagators is a very strong and verifiable prediction, it was not included in the [falsification subsection](#) because it is not falsifiable in a strict epistemological sense.

## 2. Surface-to-volume ratio and the evolution and development of the extracellular matrix.

An important relationship between cell surface-to-volume ratio and the evolution of differentiated multicellularity was proposed earlier ([Part X-Evolution](#)), in particular between the neuron's high surface-to-volume ratio and the evolution of its function. Under the predicted relationship between regenerative capacity and surface-to-volume ratio (see [Part X-Ontogeny](#)) neuron-shaped cells are expected to be the most difficult to regenerate. This is the developmental price to pay for a higher-order, dynamically faster form of multicellular *self* that neurons make possible. On the other hand, glial cells (companions of neurons in the nervous tissue) have a smaller surface-to-volume ratio than neurons so they would support neurons by constraining to some extent the diffusion flux of Nanney's extracellular propagators  $F_N^{\vec{}}$  in  $S_E$ . This hypothesis is supported by the fact that the cells serving as neural stem cells are ependymal cells [49], which are precisely those of the smallest surface-to-volume ratio in the neuroglia. Because this analysis is based on constraints and not on their specific molecular embodiments, the logic of the neurons and glial cells example can be extended to the evolution and development of the extracellular matrix in general. That is, the extracellular matrix was not only shaped by natural selection making it provide the cells structural and biochemical support but also developmental support, understood as fine-tuned differential constraints to the diffusion flux of Nanney's extracellular propagators in  $S_E$ . Moreover, the evolution of this developmental support probably preceded the evolution of all other types of support, given the critical role of the  $F_N^{\vec{}}$  gradients in the emergence and preservation of the multicellular *telos*.

**3. Natural developmental arrests or diapauses.** The account for natural diapauses in this theory follows directly from the description in [Part X-Ontogeny](#). Such diapauses occur in arthropods [50] and some species of killifish (Cyprinodontiformes) [51]. Natural diapauses are a metastable equilibrium state characterized by (i) the dissipation of Nanney's extracellular propagators  $F_N^{\rightarrow}$  in  $S_E$  under certain critical values or (ii) the inability of these gradients to constrain Waddington's embodyers  $F_W$  in the cells' nuclei because the critical gene products for protein channels/carriers or signal transducers are non-functional or not expressed. For example, if in some organism the function of the gene products critical for the facilitated diffusion/signal transduction of the current  $F_N^{\rightarrow}$  is temperature-dependent, then at that time development will enter a diapause given certain thermal conditions and resume when those conditions are lost.

**4.  $F_N^{\rightarrow}$  gradients and tissue regeneration.** Whereas the scope of the theory is the dynamics of cell differentiation and the evolution of differentiated multicellularity, it may provide some hints about other developmental processes such as tissue regeneration after extrinsic damage. For instance, I hypothesize that an important constraint driving the regenerative response to wounds is the gradient  $\left| \vec{\nabla} \Phi_N \left( D_{(1;t_{\text{wound}})}, \dots, D_{(n;t_{\text{wound}})}, r, \theta, \phi \right) \right| \gg \left| \vec{\nabla} \Phi_N \left( D_{(1;t_{\text{wound}}-\Delta t)}, \dots, D_{(n;t_{\text{wound}}-\Delta t)}, r, \theta, \phi \right) \right|$ ,  $(r, \theta, \phi) \in S_E$  generated by the wound itself. This drive occurs because a wound creates an immediate, significant gradient at its edges. Related evidence has been found already as extracellular  $H_2O_2$  gradients mediating wound detection in zebrafish [52]. If relevant variables (such as  $F_N^{\rightarrow}$  diffusivity in the extracellular space  $S_E$ , see [Corollary #2](#)) prevent this gradient from dissipating quickly, it should contribute to a developmental regenerative response as it dissipates gradually. If different tissues of the same multicellular individual are compared, a significant negative correlation should be observable between the regenerative capacity after injury in a tissue and the average cell surface-to-volume ratio in that tissue, once controlling for average cell characteristic length.

**5. Effects of microgravity on development.** In the last few decades a number of abnormal effects of microgravity on development-related phenomena have been described, including for mammal tissue culture [53], plant growth [54], human gene expression [55], cytoskeleton organization and general embryo development ([56] and references therein). A general explanation proposed for these effects is that microgravity introduces a significant degree of mechanical perturbation on critical structures for cells and tissues. These perturbed structures as a whole would be the "gravity sensors". Without dismissing these "gravity sensors" as relevant, I suggest that a key perturbation on development elicitable by microgravity is a significant alteration of the instantaneous  $F_N^{\rightarrow}$  distribution in the extracellular space  $S_E$ . This could be explained in turn by changes in the diffusion dynamics as evidence for changes in the diffusion of miscible fluids suggest [57], and/or a significant density difference between the extracellular space  $S_E$  and the cells.

**6. Why plant seeds need water.** It is a well-known fact that plant seeds only need certain initial water intake to be released from dormancy and begin to germinate with no further extrinsic support. Whereas this specific requirement of water has been associated to embryo expansion and metabolic activation of the seeds [58, 59], I submit that it is also associated to the fundamental need for a proper medium in  $S_E$  where the critical  $F_N^{\rightarrow}$  gradients can emerge. These gradients would be in turn required for the intrinsic regulation of the asymmetric divisions already shown critical for cell differentiation in plants [60].

## Concluding remarks

Here, I show that scientifically tenable, instantaneous teleology in nature can emerge only from local and level-of-scale-specific boundary conditions (i.e., constraints) that are *stochastically independent* with respect to each other at certain critical loci such as histone H3 modification sites. Furthermore, the only way such requisite of stochastic independence can be fulfilled intrinsically is that a higher-order constraint emerges from the synergistic coupling of lower-order constraint generating systems, an emergent transition first proposed by T. Deacon. Whereas this thermodynamically spontaneous, intrinsic constraint—the logically-consistent *telos*—is dependent on molecular substrates embodying it at any instant, these substrates can be added, replaced or even dispensed with at any instant as long as the *telos* is preserved. For all these reasons, the differentiated multicellular organism described in this theory is no mechanism, machine, or “self-organizing” system of any type as mechanisms, machines and “self-organizing” systems entail an *explicit deterministic or stochastic dependence* between their component dynamics. Thus, the emergence of differentiated multicellularity throughout evolution and in every successful ontogenetic process has been—and still is—the emergence of unprecedented intrinsic constraints or *selves* in the natural world; *selves* whom no mechanism, machine, or “self-organizing” system could ever be.

## Methods

### Data collection

The genomic coordinates of all annotated RefSeq TSSs for the hg19 (*Homo sapiens*), mm9 (*Mus musculus*), and dm3 (*Drosophila melanogaster*) assemblies were downloaded from the UCSC database. Publicly available tandem datafiles of ChIP-seq (comprising  $1 \times 36$  bp,  $1 \times 50$  bp, and  $1 \times 75$  bp reads, depending on the data series; details available via GEO accession codes listed in Supporting Information) on histone H3 modifications and RNA-seq (comprising  $1 \times 36$  bp,  $1 \times 100$  bp, and  $2 \times 75$  bp reads, depending on the data series; details available via GEO accession codes listed in Supporting Information) for each analyzed cell sample in each species were downloaded from the ENCODE, modENCODE or NCBI's SRA databases [61, 62, 63, 64, 65, 66, 67].

The criteria for selecting cell type/cell sample datasets in each species was (i) excluding those associated to abnormal karyotypes and (ii) among the remaining datasets, choosing the group that maximizes the number of specific histone H3 modifications shared. Under these criteria, the comprised cell type/sample datasets in this work were thus:

***H. sapiens*** 6 cell types: HSMM (skeletal muscle myoblasts), HUVEC (umbilical vein endothelial cells), NHEK (epidermal keratinocytes), GM12878 (B-lymphoblastoids), NHLF (lung fibroblasts) and H1-hESC (embryonic stem cells).

9 histone H3 modifications: H3K4me1, H3K4me2, H3K4me3, H3K9ac, H3K9me3, H3K27ac, H3K27me3, H3K36me3, and H3K79me2.

***M. musculus*** 5 cell types: 8-weeks-adult heart, 8-weeks-adult liver, E14-day0 (embryonic stem cells after zero days of differentiation), E14-day4 (embryonic stem cells after four days of differentiation), and E14-day6 (embryonic stem cells after six days of differentiation).

5 histone H3 modifications: H3K4me1, H3K4me3, H3K27ac, H3K27me3, and H3K36me3.

***D. melanogaster*** 9 cell samples: 0-4h embryos, 4-8h embryos, 8-12h embryos, 12-16h embryos, 16-20h embryos, 20-24h embryos, L1 larvae, L2 larvae, and pupae.

6 histone H3 modifications: H3K4me1, H3K4me3, H3K9ac, H3K9me3, H3K27ac, and H3K27me3.

## ChIP-seq read profiles and normalization

The first steps in the EFilter algorithm by Kumar *et al.*—which predicts mRNA levels in log-FPKM (fragments per transcript kilobase per million fragments mapped) with high accuracy ( $R \sim 0.9$ ) [23]—were used to generate ChIP-seq read signal profiles for the histone H3 modifications data. Namely, (i) dividing the genomic region from 2 kbp upstream to 4 kbp downstream of each TSS into 30 200-bp-long bins, in each of which ChIP-seq reads were later counted; (ii) dividing the read count signal for each bin by its corresponding control (Input/IgG) read density to minimize artifactual peaks; (iii) estimating this control read density within a 1-kbp window centered on each bin, if the 1-kbp window contained at least 20 reads. Otherwise, a 5-kbp window, or else a 10-kbp window was used if the control reads were less than 20. When the 10-kbp length was insufficient, a pseudo-count value of 20 reads per 10kbp was set as the control read density. This implies that the denominator (i.e., control read density) is at least 0.4 reads per bin. When replicates were available, the measure of central tendency used was the median of the replicate read count values.

## ChIP-seq read count processing

When the original format was SRA, each datafile was pre-processed with standard tools in the pipeline

```
fastq-dump → bwa aln [genome.fa] → bwa samse → samtools view -bS -F 4  
→ samtools sort → samtools index
```

to generate its associated BAM and BAI files. Otherwise, the tool

```
bedtools multicov -bams [file.bam] -bed [bins_and_controlwindows.bed]
```

was applied (excluding failed-QC reads and duplicate reads by default) directly on the original BAM file (the BAI file is required implicitly) to generate the corresponding read count file in BED format.

## RNA-seq data processing

The processed data were mRNA abundances in FPKM at RefSeq TSSs. When the original format was GTF (containing already FPKM values, as in the selected ENCODE RNA-seq datafiles for *H. sapiens*), those values were used directly in the analysis. When the original format was SAM, each datafile was pre-processed by first sorting it to generate then a BAM file using `samtools view -bS`. If otherwise the original format was BAM, mRNA levels at RefSeq TSSs were then calculated with FPKM as unit using *Cufflinks* [68] directly on the original file with the following three options:

```
-GTF-guide <reference_annotation.(gtf/gff)>  
-frag-bias-correct <genome.fa>  
-multi-read-correct
```

When the same TSS (i.e., same genomic coordinate and strand) displayed more than one identified transcript in the *Cufflinks* output, the respective FPKM values were added. Also, when replicates were available the measure of central tendency used was the median of the replicate FPKM values.

For each of the three species, all TSS<sub>def</sub>—defined as those TSSs with measured mRNA abundance (i.e., FPKM > 0) in all cell types/cell samples—were determined. The number of TSS<sub>def</sub> found for each species were  $N_{\text{TSS}_{\text{def}}}(\textit{Homo sapiens}) = 14,742$ ;  $N_{\text{TSS}_{\text{def}}}(\textit{Mus musculus}) = 16,021$ ; and  $N_{\text{TSS}_{\text{def}}}(\textit{Drosophila melanogaster}) = 11,632$ . Then, for each cell type/cell sample, 30 genomic bins were defined and denoted by the distance (in bp) between their 5'-end and their respective TSS<sub>def</sub> genomic coordinate: “-2000”, “-1800”, “-1600”, “-1400”, “-1200”, “-1000”, “-800”, “-600”, “-400”, “-200”, “0” (TSS<sub>def</sub> or ‘+1’), “200”, “400”, “600”, “800”, “1000”, “1200”, “1400”, “1600”, “1800”, “2000”, “2200”, “2400”, “2600”, “2800”, “3000”, “3200”, “3400”, “3600”, and “3800”. Then, for each cell type/cell sample, a ChIP-seq read signal was computed for all bins in all TSS<sub>def</sub> genomic regions (e.g., in the “-2000” bin of the *Homo sapiens* TSS with RefSeq ID: NM\_001127328, H3K27ac<sub>-2000</sub> = 4.68 in H1-hESC stem cells). Data input tables, with  $n_m$  being the number of histone H3 modifications comprised, were generated following this structure of rows and columns:

|                               |                        |     |                              |     |                       |     |                              |      |
|-------------------------------|------------------------|-----|------------------------------|-----|-----------------------|-----|------------------------------|------|
|                               | H3[1] <sub>-2000</sub> | ... | H3[ $n_m$ ] <sub>-2000</sub> | ... | H3[1] <sub>3800</sub> | ... | H3[ $n_m$ ] <sub>3,800</sub> | FPKM |
| 1                             |                        |     |                              |     |                       |     |                              |      |
| :                             |                        |     |                              |     |                       |     |                              |      |
| $N_{\text{TSS}_{\text{def}}}$ |                        |     |                              |     |                       |     |                              |      |

The tables were written then to the following data files:

***H. sapiens***: Hs\_Gm12878.dat, Hs\_H1hesc.dat, Hs\_Hsmm.dat, Hs\_Huvec.dat, Hs\_Nhek.dat, Hs\_Nh1f.dat■

***M. musculus***: Mm\_Heart.dat, Mm\_Liver.dat, Mm\_E14-d0.dat, Mm\_E14-d4.dat, Mm\_E14-d6.dat■

***D. melanogaster***: Dm\_E0-4.dat, Dm\_E4-8.dat, Dm\_E8-12.dat, Dm\_E12-16.dat, Dm\_E16-20.dat, Dm\_E20-24.dat, Dm\_L1.dat, Dm\_L2.dat, Dm\_Pupae.dat■



## Computation of *ctalk\_non\_epi* profiles

If the variables  $X_i$  (representing the signal for histone H3 modification  $X$  in the genomic bin  $i \in \{-2000, \dots, 3800\}$ ),  $Y_j$  (representing the signal for histone H3 modification  $Y$  in the genomic bin  $j \in \{-2000, \dots, 3800\}$ ) and  $Z$  (representing  $\log_2$ -transformed FPKM values) are random variables, then the covariance of  $X_i$  and  $Y_j$  can be decomposed in terms of their linear relationship with  $Z$  as follows:

$$\text{Cov}(X_i, Y_j) = \underbrace{\frac{\text{Cov}(X_i, Z)\text{Cov}(Y_j, Z)}{\text{Var}(Z)}}_{\substack{\text{covariance of } X_i \text{ and } Y_j \\ \text{resulting from their} \\ \text{linear relationship with } Z}} + \underbrace{\text{Cov}(X_i, Y_j|Z)}_{\substack{\text{covariance of } X_i \text{ and } Y_j \\ \text{orthogonal to } Z}}. \quad (1)$$

where the second summand  $\text{Cov}(X_i, Y_j|Z)$  is the partial covariance between  $X_i$  and  $Y_j$  given  $Z$ . It is easy to see that  $\text{Cov}(X_i, Y_j|Z)$  is a local approximation of Nanney's constraints  $C_N$  on histone H3 modifications, as anticipated in the preliminary theoretical definitions (a straightforward corollary is that Waddington's constraints  $C_W$  can in turn be approximated by  $\frac{\text{Cov}(X_i, Z)\text{Cov}(Y_j, Z)}{\text{Var}(Z)}$ ). To make the *ctalk\_non\_epi* profiles comparable, however,  $\text{Cov}(X_i, Y_j|Z)$  values had to be normalized by the standard deviations of the residuals of  $X_i$  and  $Y_j$  with respect to  $Z$ . In other words, the partial correlation  $\text{Cor}(X_i, Y_j|Z)$  values were needed. Nevertheless, a correlation value does not have a straightforward interpretation, whereas its square—typically known as *coefficient of determination*, *strength of the correlation*, or simply  $r^2$ —does: it represents the relative (i.e., fraction of) variance of one random variable explained by the other. For this reason,  $\text{Cor}(X_i, Y_j|Z)^2$  was used to represent the strength of the association, and then multiplied by the sign of the correlation to represent the direction of the association. Thus, after  $\log_2$ -transforming the  $X_i$ ,  $Y_j$  and  $Z$  data, each pairwise combination of bin-specific histone H3 modifications  $\{X_i, Y_j\}$  contributed with the value

$$\text{ctalk\_non\_epi}(X_i, Y_j) = \underbrace{\text{sgn}\left(\text{Cor}(X_i, Y_j|Z)\right)}_{\substack{\text{partial correlation} \\ \text{sign} \in \{-1, 1\}}} \underbrace{\left(\text{Cor}(X_i, Y_j|Z)\right)^2}_{\substack{\text{partial correlation} \\ \text{strength} \in [0, 1]}}. \quad (2)$$

This implies that for each pairwise combination of histone H3 modifications  $\{X, Y\}$ , there are  $30$  (bins for  $X$ )  $\times$   $30$  (bins for  $Y$ ) =  $900$  (bin-combination-specific *ctalk\_non\_epi* values). To increase the robustness of the analysis against the departures of the actual nucleosome distributions from the  $30 \times 200$ -bp bins model, the values were then sorted in descending order and placed in a 900-tuple.

For a cell type/cell sample from a species with data for  $n_m$  histone H3 modifications, e.g.,  $n_m(\textit{Mus musculus}) = 5$ , the length of the final *ctalk\_non\_epi* profile comprising all possible  $\{X, Y\}$  combinations would be  ${}^{n_m}C_2 \times 900$ . However, a final data filtering was performed.

The justification for this additional filtering was that some pairwise partial correlation values were expected to be strong and significant, which was later

confirmed. Namely, (i) those involving the same histone H3 modification in the same amino acid residue (e.g.,  $\text{Cor}(\text{H3K9ac}_{-200}, \text{H3K9ac}_{-400}|\text{FPKM}) > 0$ ;  $\text{Cor}(\text{H3K4me3}_{-200}, \text{H3K4me3}_{-200}|\text{FPKM}) = 1$ ), (ii) those involving a different type of histone H3 modification in the same amino acid residue (e.g.,  $\text{Cor}(\text{H3K27ac}_{-800}, \text{H3K27me3}_{-600}|\text{FPKM}) < 0$ ), and (iii) those involving the same type of histone H3 modification in the same amino acid residue (e.g.,  $\text{Cor}(\text{H3K4me2}_{-400}, \text{H3K4me3}_{-400}|\text{FPKM}) > 0$ ) in part because ChIP-antibody cross reactivity has been shown able to introduce artifacts on the accurate assessment of some histone-crosstalk associations [69, 70]. For these reasons, in each species all pairwise combinations of post-translational modifications involving the same amino acid residue in the H3 histone were then identified as “trivial” and excluded from the *ctalk\_non\_epi* profiles construction. E.g., for *Mus musculus* cell-type datasets the histone modifications comprised were H3K4me1, H3K4me3, H3K27ac, H3K27me3, and H3K36me3 (i.e.,  $n_m = 5$ ), then the combinations H3K4me1-H3K4me3 and H3K27ac-H3K27me3 were filtered out. Therefore, the length of the *ctalk\_non\_epi* profiles for *Mus musculus* was  $({}^5C_2 - 2) \times 900 = 7,200$ .

## Statistical significance assessment

The statistical significance of the partial correlation  $\text{Cor}(X_i, Y_j|Z)$  values, necessary for constructing the *ctalk\_non\_epi* profiles, was estimated using Fisher’s z-transformation [71]. Under the null hypothesis  $\text{Cor}(X_i, Y_j|Z) = 0$  the statistic  $z = \sqrt{N_{\text{TSS}_{\text{def}}} - |Z| - 3} \frac{1}{2} \ln \left( \frac{1 + \text{Cor}(X_i, Y_j|Z)}{1 - \text{Cor}(X_i, Y_j|Z)} \right)$ , where  $N_{\text{TSS}_{\text{def}}}$  is the sample size and  $|Z| = 1$  (i.e., one control variable), follows asymptotically a  $N(0, 1)$  distribution. The *p*-values can be then computed easily using the  $N(0, 1)$  probability function.

Multiple comparisons correction of the *p*-values associated to each *ctalk\_non\_epi* profile was performed using the Benjamini-Yekutieli method [72]. The parameter used was the number of all possible (i.e., *before* excluding “trivial” pairwise combinations of histone H3 modifications, to further increase the conservativeness of the correction) comparisons:  $(n_m \times 30) C_2$ . From the resulting *q*-values associated to each *ctalk\_non\_epi* profile an empirical cumulative distribution was obtained, which in turn was used to compute a threshold *t*. The value of *t* was optimized to be the maximum value such that within the *q*-values smaller than *t* is expected less than 1 false-positive partial correlation. Consequently, if  $q\text{-value}[i] \geq t$  then the associated partial correlation value was identified as not significant (i.e., equal to zero) in the respective *ctalk\_non\_epi* profile.

## Hierarchical cluster analysis of *ctalk\_non\_epi* and mRNA abundance profiles

The goal of this step was to evaluate the significant *ctalk\_non\_epi*-profile clusters (if any) in the phenograms (i.e., phenotypic similarity dendrograms) obtained from hierarchical cluster analysis (HCA). For each species, HCA was performed on (i) the *ctalk\_non\_epi* profiles of each cell type/sample (Figure 3A, 3C, and 3E) and (ii) the log<sub>2</sub>-transformed FPKM profiles (i.e., mRNA abundance) of each cell type/sample (Figure 3B, 3D, and 3F). Important to the HCA

technique is the choice of a metric (for determining the distance between any two profiles) and a cluster-linkage method (for determining the distance between any two clusters).

Different ChIP-seq antibodies display differential binding affinities (with respect to different epitopes or even the same epitope, depending on the manufacturer) that are intrinsic and irrespective to the biological phenomenon of interest. For this reason, comparing directly the strengths (i.e., magnitudes) in the *ctalk\_non\_epi* profiles (e.g., using Euclidean distance as metric) is to introduce significant biases in the analysis. In contrast, the “correlation distance” metric—customarily used for comparing gene expression profiles—defined between any two profiles  $pro[i], pro[j]$  as

$$d_r(pro[i], pro[j]) = 1 - \text{Cor}(pro[i], pro[j]) \quad (3)$$

compares instead the “shape” of the profiles, hence it was the metric used here (as a consequence of what was highlighted previously, the “correlation distance” metric is also invariant under linear transformations of the profiles). On the other hand, the cluster-linkage method chosen was the UPGMA (Unweighted Pair Group Method with Arithmetic Mean) or “average” method in which the distance  $D(A, B)$  between any clusters  $A$  and  $B$  is defined as

$$D(A, B) = \frac{1}{|A||B|} \sum_{\substack{pro[k] \in A \\ pro[l] \in B}} d_r(pro[k], pro[l]), \quad (4)$$

that is, the mean of all distances  $d_r(pro[k], pro[l])$  such that  $pro[k] \in A$  and  $pro[l] \in B$  (this method was chosen because it has been shown to yield the highest cophenetic correlation values when using the “correlation distance” metric [73]). Cluster statistical significance was assessed as *au* (approximately unbiased) and *bp* (bootstrap probability) significance scores by nonparametric bootstrap resampling using the *Pvclust* [27] add-on package for the *R* software [74]. The number of bootstrap replicates in each analysis was 10,000.

## Suitability of FPKM as unit of mRNA abundance

Previous research has pinpointed that FPKM may not always be an adequate unit of transcript abundance in differential expression studies. It was shown that, if transcript size distribution varies significantly among the samples, FPKM and RPKM (reads per kilobase of transcript per million reads mapped) may introduce significant biases. For this reason another abundance unit TPM (transcripts per million)—which is a linear transformation of the FPKM value for each sample—was proposed to overcome the limitation [75]. However, this issue was not a problem for this study.

This is because partial correlation, used to construct the *ctalk\_non\_epi* profiles later subject to HCA, is invariant under linear transformations of the control variable  $Z$  (i.e.,  $\text{Cor}(X_i, Y_j|Z) = \text{Cor}(X_i, Y_j|aZ+b)$  for any two scalars  $\{a, b\}$ ). Importantly, this property also implies that *ctalk\_non\_epi* profiles are controlling not only for mRNA abundance but also for any other biological variable displaying a strong linear relationship with mRNA abundance (e.g., chromatin accessibility represented by DNase I hypersensitivity, as shown in [69]). Similarly,

hierarchical clustering of mRNA abundance profiles is invariant under linear transformations of the profiles, because  $\text{Cor}(Z_i, Z_j) = \text{Cor}(aZ_i + b, cZ_j + d)$  (provided  $ac > 0$ ).

## Acknowledgements

I wish to thank the following people:

- John Tyler Dodge, horn soloist at the *Orquesta Filarmónica de Santiago*, for his interest in this work and his valuable questions, which pushed me to the limit of my abilities in the purpose of making the theoretical description self-explanatory.
- Inti Pedroso, Kenneth M. Weiss and José M. Neto for reviewing this manuscript and their valuable questions.
- Alejandro Maass for his interest in this work and his valuable questions.
- My anonymous colleagues who reviewed my grant proposal on behalf of FONDECYT.

Also, I wish to thank the following institutions:

- The National Fund for Scientific and Technological Development (FONDECYT, Chile) for the postdoctoral grant (see details in [Funding](#)).
- The National Laboratory for High Performance Computing (NLHPC, Chile) for providing me with a free academic account, which helped me carry out efficiently most of the computational analyses described in this monograph.
- The *Math<sup>omics</sup>* Lab (Chile), for kindly helping me with the setup of my NLHPC account.

## Additional information

No institution (including the funder) or person other than the author had any role in study conception, design, publicly-available data collection, computational analysis, theory development, monograph writing, or the decision to submit this preprint to bioRxiv.

## Copyright

The copyright holder for this preprint is the author. It is made made available under the Creative Commons Attribution 4.0 International License. To view a copy of this license, visit <http://creativecommons.org/licenses/by/4.0/>.

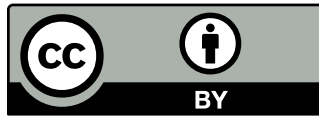

## Funding

---

| Funder                                                                | Grant reference number | Author           |
|-----------------------------------------------------------------------|------------------------|------------------|
| National Fund for Scientific and Technological Development (FONDECYT) | 3140328                | Felipe A. Veloso |

---

## References

- [1] Slack JMW (2002) Timeline: Conrad Hal Waddington: the last renaissance biologist? *Nat Rev Genet* 3: 889–895. doi: [10.1038/nrg933](https://doi.org/10.1038/nrg933).
- [2] Waddington CH (1957) *The strategy of the genes: a discussion of some aspects of theoretical biology*. London: Allen & Unwin.
- [3] Wolffe AP (1999) Epigenetics: Regulation through repression. *Science* 286: 481–486. doi: [10.1126/science.286.5439.481](https://doi.org/10.1126/science.286.5439.481).
- [4] Bonasio R, Tu S, Reinberg D (2010) Molecular signals of epigenetic states. *Science* 330: 612–6. doi: [10.1126/science.1191078](https://doi.org/10.1126/science.1191078).
- [5] Kamakura M (2011) Royalactin induces queen differentiation in honeybees. *Nature* 473: 478–483. doi: [10.1038/nature10093](https://doi.org/10.1038/nature10093).
- [6] Fraser P (2010). Defining epigenetics. Interviews by G. Riddihough. *Science* [Video podcast] 00:05:34–00:05:47. URL <http://videolab.sciencemag.org/featured/650920373001/1>.
- [7] Orphanides G, Reinberg D (2002) A unified theory of gene expression. *Cell* 108: 439–451. doi: [10.1016/s0092-8674\(02\)00655-4](https://doi.org/10.1016/s0092-8674(02)00655-4).
- [8] Li G, Reinberg D (2011) Chromatin higher-order structures and gene regulation. *Current Opinion in Genetics & Development* 21: 175–186. doi: [10.1016/j.gde.2011.01.022](https://doi.org/10.1016/j.gde.2011.01.022).
- [9] Cope NF, Fraser P, Eskiw CH (2010) The yin and yang of chromatin spatial organization. *Genome Biol* 11: 204. doi: [10.1186/gb-2010-11-3-204](https://doi.org/10.1186/gb-2010-11-3-204).
- [10] Ralston A, Shaw K (2008) Gene expression regulates cell differentiation. *Nat Educ* 1: 127.
- [11] Berger SL, Kouzarides T, Shiekhhattar R, Shilatifard A (2009) An operational definition of epigenetics. *Genes & Development* 23: 781–783. doi: [10.1101/gad.1787609](https://doi.org/10.1101/gad.1787609).
- [12] Varela FG, Maturana HR, Uribe R (1974) Autopoiesis: the organization of living systems, its characterization and a model. *Biosystems* 5: 187–196.
- [13] Abel DL, Trevors JT (2006) Self-organization vs. self-ordering events in life-origin models. *Physics of Life Reviews* 3: 211–228. doi: [10.1016/j.plrev.2006.07.003](https://doi.org/10.1016/j.plrev.2006.07.003).
- [14] Reinberg D (2010). Defining epigenetics. Interviews by G. Riddihough. *Science* [Video podcast] 00:01:25–00:01:35. URL <http://videolab.sciencemag.org/featured/650920373001/1>.
- [15] Arnone MI, Davidson EH (1997) The hardwiring of development: organization and function of genomic regulatory systems. *Development* 124: 1851–64.
- [16] Maduro MF (2010) Cell fate specification in the *C. elegans* embryo. *Dev Dyn* 239: 1315–29. doi: [10.1002/dvdy.22233](https://doi.org/10.1002/dvdy.22233).
- [17] Warner DA, Shine R (2008) The adaptive significance of temperature-dependent sex determination in a reptile. *Nature* 451: 566–568. doi: [10.1038/nature06519](https://doi.org/10.1038/nature06519).

- [18] Power ML, Schulkin J (2013) Maternal regulation of offspring development in mammals is an ancient adaptation tied to lactation. *Applied & Translational Genomics* 2: 55–63. doi: [10.1016/j.atg.2013.06.001](https://doi.org/10.1016/j.atg.2013.06.001).
- [19] Ladewig J, Koch P, Brüstle O (2013) Leveling waddington: the emergence of direct programming and the loss of cell fate hierarchies. *Nature Reviews Molecular Cell Biology* 14: 225–236. doi: [10.1038/nrm3543](https://doi.org/10.1038/nrm3543).
- [20] Nanney DL (1958) Epigenetic control systems. *Proceedings of the National Academy of Sciences* 44: 712–717. doi: [10.1073/pnas.44.7.712](https://doi.org/10.1073/pnas.44.7.712).
- [21] Huang S (2012) The molecular and mathematical basis of waddington's epigenetic landscape: a framework for post-darwinian biology? *Bioessays* 34: 149–57. doi: [10.1002/bies.201100031](https://doi.org/10.1002/bies.201100031).
- [22] Losick R, Desplan C (2008) Stochasticity and cell fate. *Science* 320: 65–68.
- [23] Kumar V, Muratani M, Rayan NA, Kraus P, Lufkin T, et al. (2013) Uniform, optimal signal processing of mapped deep-sequencing data. *Nat Biotechnol* 31: 615–622. doi: [10.1038/nbt.2596](https://doi.org/10.1038/nbt.2596).
- [24] White KP (1999) Microarray analysis of *Drosophila* development during metamorphosis. *Science* 286: 2179–2184. doi: [10.1126/science.286.5447.2179](https://doi.org/10.1126/science.286.5447.2179).
- [25] Cantera R, Ferreiro MJ, Aransay AM, Barrio R (2014) Global gene expression shift during the transition from early neural development to late neuronal differentiation in *Drosophila melanogaster*. *PLoS ONE* 9: e97703. doi: [10.1371/journal.pone.0097703](https://doi.org/10.1371/journal.pone.0097703).
- [26] Mody M, Cao Y, Cui Z, Tay KY, Shyong A, et al. (2001) Genome-wide gene expression profiles of the developing mouse hippocampus. *Proceedings of the National Academy of Sciences* 98: 8862–8867. doi: [10.1073/pnas.141244998](https://doi.org/10.1073/pnas.141244998).
- [27] Suzuki R, Shimodaira H (2006) Pvcust: an r package for assessing the uncertainty in hierarchical clustering. *Bioinformatics* 22: 1540–1542. doi: [10.1093/bioinformatics/btl117](https://doi.org/10.1093/bioinformatics/btl117).
- [28] Chen L, Xiao S, Pang K, Zhou C, Yuan X (2014) Cell differentiation and germ-soma separation in ediacaran animal embryo-like fossils. *Nature* doi: [10.1038/nature13766](https://doi.org/10.1038/nature13766).
- [29] Meyerowitz EM (2002) Plants compared to animals: The broadest comparative study of development. *Science* 295: 1482–1485. doi: [10.1126/science.1066609](https://doi.org/10.1126/science.1066609).
- [30] Nielsen C (2008) Six major steps in animal evolution: are we derived sponge larvae? *Evolution & Development* 10: 241–257. doi: [10.1111/j.1525-142x.2008.00231.x](https://doi.org/10.1111/j.1525-142x.2008.00231.x).
- [31] Deacon TW (2012) *Incomplete nature: How mind emerged from matter*. New York: W.W. Norton & Co., 1st edition.
- [32] Donoghue PCJ, Antcliffe JB (2010) Early life: Origins of multicellularity. *Nature* 466: 41–42. doi: [10.1038/466041a](https://doi.org/10.1038/466041a).
- [33] Turing AM (1952) The chemical basis of morphogenesis. *Philosophical Transactions of the Royal Society of London B: Biological Sciences* 237: 37–72.
- [34] van Nimwegen E (2003) Scaling laws in the functional content of genomes. *Trends in Genetics* 19: 479–484. doi: [10.1016/s0168-9525\(03\)00203-8](https://doi.org/10.1016/s0168-9525(03)00203-8).



- [35] Wilson D, Charoensawan V, Kummerfeld SK, Teichmann SA (2007) DBD–taxonomically broad transcription factor predictions: new content and functionality. *Nucleic Acids Research* 36: D88–D92. doi: [10.1093/nar/gkm964](https://doi.org/10.1093/nar/gkm964).
- [36] Haeckel E (1874) Die gastraea-theorie, die phylogenetische classification des thierreichs und die homologie der keimblätter. *Jenaische Zeitschrift für Naturwissenschaft* 8: 1-55.
- [37] Metschnikoff E (1886) *Embryologische Studien an Medusen: ein beitrage zur Genealogie der primitiv-Organ*. A. Hölder.
- [38] Kirk DL (2005) A twelve-step program for evolving multicellularity and a division of labor. *Bioessays* 27: 299–310. doi: [10.1002/bies.20197](https://doi.org/10.1002/bies.20197).
- [39] Willensdorfer M (2009) On the evolution of differentiated multicellularity. *Evolution* 63: 306-23. doi: [10.1111/j.1558-5646.2008.00541.x](https://doi.org/10.1111/j.1558-5646.2008.00541.x).
- [40] Mikhailov KV, Konstantinova AV, Nikitin MA, Troshin PV, Rusin LY, et al. (2009) The origin of metazoa: a transition from temporal to spatial cell differentiation. *Bioessays* 31: 758-68. doi: [10.1002/bies.200800214](https://doi.org/10.1002/bies.200800214).
- [41] Gavrillets S (2010) Rapid transition towards the division of labor via evolution of developmental plasticity. *PLoS Computational Biology* 6: e1000805. doi: [10.1371/journal.pcbi.1000805](https://doi.org/10.1371/journal.pcbi.1000805).
- [42] Levin TC, Greaney AJ, Wetzel L, King N (2014) The rosetteless gene controls development in the choanoflagellate *S. rosetta*. *eLife* 3. doi: [10.7554/elife.04070](https://doi.org/10.7554/elife.04070).
- [43] Young HE, Black AC (2003) Adult stem cells. *Anat Rec* 276A: 75–102. doi: [10.1002/ar.a.10134](https://doi.org/10.1002/ar.a.10134).
- [44] Cai S, Fu X, Sheng Z (2007) Dedifferentiation: A new approach in stem cell research. *BioScience* 57: 655. doi: [10.1641/b570805](https://doi.org/10.1641/b570805).
- [45] Donà E, Barry JD, Valentin G, Quirin C, Khmelinskii A, et al. (2013) Directional tissue migration through a self-generated chemokine gradient. *Nature* 503: 285-9. doi: [10.1038/nature12635](https://doi.org/10.1038/nature12635).
- [46] Venkiteswaran G, Lewellis SW, Wang J, Reynolds E, Nicholson C, et al. (2013) Generation and dynamics of an endogenous, self-generated signaling gradient across a migrating tissue. *Cell* 155: 674–687. doi: [10.1016/j.cell.2013.09.046](https://doi.org/10.1016/j.cell.2013.09.046).
- [47] Greenbaum D, Colangelo C, Williams K, Gerstein M (2003) Comparing protein abundance and mrna expression levels on a genomic scale. *Genome Biol* 4: 117.
- [48] Ning K, Fermin D, Nesvizhskii AI (2012) Comparative analysis of different label-free mass spectrometry based protein abundance estimates and their correlation with RNA-seq gene expression data. *J Proteome Res* 11: 2261–2271. doi: [10.1021/pr201052x](https://doi.org/10.1021/pr201052x).
- [49] Meletis K, Barnabé-Heider F, Carlén M, Evergren E, Tomilin N, et al. (2008) Spinal cord injury reveals multilineage differentiation of ependymal cells. *Plos Biol* 6: e182. doi: [10.1371/journal.pbio.0060182](https://doi.org/10.1371/journal.pbio.0060182).

- [50] Sømme L (1982) Supercooling and winter survival in terrestrial arthropods. *Comparative Biochemistry and Physiology Part A: Physiology* 73: 519–543. doi: [10.1016/0300-9629\(82\)90260-2](https://doi.org/10.1016/0300-9629(82)90260-2).
- [51] Murphy WJ, Collier GE (1997) A molecular phylogeny for aplocheiloid fishes (atherinomorpha, cyprinodontiformes): the role of vicariance and the origins of annualism. *Molecular Biology and Evolution* 14: 790–799.
- [52] Niethammer P, Grabher C, Look AT, Mitchison TJ (2009) A tissue-scale gradient of hydrogen peroxide mediates rapid wound detection in zebrafish. *Nature* 459: 996–999. doi: [10.1038/nature08119](https://doi.org/10.1038/nature08119).
- [53] Unsworth BR, Lelkes PI (1998) Growing tissues in microgravity. *Nat Med* 4: 901–907. doi: [10.1038/nm0898-901](https://doi.org/10.1038/nm0898-901).
- [54] Correll MJ, Pyle TP, Millar KDL, Sun Y, Yao J, et al. (2013) Transcriptome analyses of arabidopsis thaliana seedlings grown in space: implications for gravity-responsive genes. *Planta* 238: 519–533. doi: [10.1007/s00425-013-1909-x](https://doi.org/10.1007/s00425-013-1909-x).
- [55] Hammond T, Lewis F, Goodwin T, Linnehan R, Wolf D, et al. (1999) Gene expression in space. *Nature Medicine* 5: 359–359. doi: [10.1038/7331](https://doi.org/10.1038/7331).
- [56] Crawford-Young SJ (2006) Effects of microgravity on cell cytoskeleton and embryogenesis. *The International Journal of Developmental Biology* 50: 183–191. doi: [10.1387/ijdb.052077sc](https://doi.org/10.1387/ijdb.052077sc).
- [57] Pojman JA, Bessonov N, Volpert V, Paley MS (2007) Miscible fluids in microgravity (MFMG): A zero-upmass investigation on the international space station. *Microgravity Sci Technol* 19: 33–41. doi: [10.1007/bf02870987](https://doi.org/10.1007/bf02870987).
- [58] Rajjou L, Duval M, Gallardo K, Catusse J, Bally J, et al. (2012) Seed germination and vigor. *Annu Rev Plant Biol* 63: 507–533. doi: [10.1146/annurev-arplant-042811-105550](https://doi.org/10.1146/annurev-arplant-042811-105550).
- [59] Finch-Savage WE, Leubner-Metzger G (2006) Seed dormancy and the control of germination. *New Phytologist* 171: 501–523. doi: [10.1111/j.1469-8137.2006.01787.x](https://doi.org/10.1111/j.1469-8137.2006.01787.x).
- [60] Smet ID, Beeckman T (2011) Asymmetric cell division in land plants and algae: the driving force for differentiation. *Nature Reviews Molecular Cell Biology* 12: 177–188. doi: [10.1038/nrm3064](https://doi.org/10.1038/nrm3064).
- [61] Celniker SE, Dillon LAL, Gerstein MB, Gunsalus KC, Henikoff S, et al. (2009) Unlocking the secrets of the genome. *Nature* 459: 927–930. doi: [10.1038/459927a](https://doi.org/10.1038/459927a).
- [62] Ram O, Goren A, Amit I, Shores N, Yosef N, et al. (2011) Combinatorial patterning of chromatin regulators uncovered by genome-wide location analysis in human cells. *Cell* 147: 1628–1639. doi: [10.1016/j.cell.2011.09.057](https://doi.org/10.1016/j.cell.2011.09.057).
- [63] Nègre N, Brown CD, Ma L, Bristow CA, Miller SW, et al. (2011) A cis-regulatory map of the *Drosophila* genome. *Nature* 471: 527–531. doi: [10.1038/nature09990](https://doi.org/10.1038/nature09990).
- [64] Dunham I, Kundaje A, Aldred SF, Collins PJ, Davis CA, et al. (2012) An integrated encyclopedia of DNA elements in the human genome. *Nature* 489: 57–74. doi: [10.1038/nature11247](https://doi.org/10.1038/nature11247).

- [65] Xiao S, Xie D, Cao X, Yu P, Xing X, et al. (2012) Comparative epigenomic annotation of regulatory DNA. *Cell* 149: 1381–1392. doi: [10.1016/j.cell.2012.04.029](https://doi.org/10.1016/j.cell.2012.04.029).
- [66] Djebali S, Davis CA, Merkel A, Dobin A, Lassmann T, et al. (2012) Landscape of transcription in human cells. *Nature* 489: 101–108. doi: [10.1038/nature11233](https://doi.org/10.1038/nature11233).
- [67] Stamatoyannopoulos JA, Snyder M, Hardison R, Ren B, Gingeras T, et al. (2012) An encyclopedia of mouse DNA elements (mouse ENCODE). *Genome Biol* 13: 418. doi: [10.1186/gb-2012-13-8-418](https://doi.org/10.1186/gb-2012-13-8-418).
- [68] Trapnell C, Williams BA, Pertea G, Mortazavi A, Kwan G, et al. (2010) Transcript assembly and quantification by RNA-seq reveals unannotated transcripts and isoform switching during cell differentiation. *Nat Biotechnol* 28: 511–515. doi: [10.1038/nbt.1621](https://doi.org/10.1038/nbt.1621).
- [69] Lasserre J, Chung HR, Vingron M (2013) Finding associations among histone modifications using sparse partial correlation networks. *PLoS Comput Biol* 9: e1003168. doi: [10.1371/journal.pcbi.1003168](https://doi.org/10.1371/journal.pcbi.1003168).
- [70] Peach SE, Rudomin EL, Udeshi ND, Carr SA, Jaffe JD (2012) Quantitative assessment of chromatin immunoprecipitation grade antibodies directed against histone modifications reveals patterns of co-occurring marks on histone protein molecules. *Mol Cell Proteomics* 11: 128–37. doi: [10.1074/mcp.M111.015941](https://doi.org/10.1074/mcp.M111.015941).
- [71] Fisher RA (1915) Frequency distribution of the values of the correlation coefficient in samples from an indefinitely large population. *Biometrika* : 507–521.
- [72] Benjamini Y, Yekutieli D (2001) The control of the false discovery rate in multiple testing under dependency. *Annals of statistics* : 1165–1188.
- [73] Saraçlı S, Doğan N, Doğan I (2013) Comparison of hierarchical cluster analysis methods by cophenetic correlation. *Journal of Inequalities and Applications* 2013: 203. doi: [10.1186/1029-242x-2013-203](https://doi.org/10.1186/1029-242x-2013-203).
- [74] R Core Team (2014) R: A Language and Environment for Statistical Computing. R Foundation for Statistical Computing, Vienna, Austria. URL <http://www.R-project.org/>.
- [75] Wagner GP, Kin K, Lynch VJ (2012) Measurement of mRNA abundance using RNA-seq data: RPKM measure is inconsistent among samples. *Theory Biosci* 131: 281–285. doi: [10.1007/s12064-012-0162-3](https://doi.org/10.1007/s12064-012-0162-3).
- [76] Hadzi J (1963) *The evolution of the Metazoa*. Macmillan.
- [77] Tompkins N, Li N, Girabawe C, Heymann M, Ermentrout GB, et al. (2014) Testing Turing's theory of morphogenesis in chemical cells. *Proceedings of the National Academy of Sciences* 111: 4397–4402.
- [78] Kupiec JJ (1997) A darwinian theory for the origin of cellular differentiation. *Molecular and General Genetics* MGG 255: 201–208. doi: [10.1007/s004380050490](https://doi.org/10.1007/s004380050490).
- [79] Paldi A (2012) What makes the cell differentiate? *Prog Biophys Mol Biol* 110: 41–3. doi: [10.1016/j.pbiomolbio.2012.04.003](https://doi.org/10.1016/j.pbiomolbio.2012.04.003).
- [80] Kim J (1999) Making sense of emergence. *Philosophical Studies* 95: 3–36. doi: [10.1023/a:1004563122154](https://doi.org/10.1023/a:1004563122154).

- [81] Kim J (2006) Emergence: Core ideas and issues. *Synthese* 151: 547–559. doi: [10.1007/s11229-006-9025-0](https://doi.org/10.1007/s11229-006-9025-0).
- [82] Altun Z, Hall D (2002). WormAtlas. URL <http://www.wormatlas.org/>.
- [83] Shannon CE (1948) A mathematical theory of communication. *Bell System Technical Journal* 27: 623–656. doi: [10.1002/j.1538-7305.1948.tb00917.x](https://doi.org/10.1002/j.1538-7305.1948.tb00917.x).

## Appendix

### Problems with current views on the self-regulation of cell differentiation and the evolution of multicellularity

Since Ernst Haeckel's "gastraea theory" [36], the most plausible models aimed to explain the evolution of differentiated multicellularity are fundamentally divorced from the epigenetic landscape model assumed to explain the self-regulatory dynamics underpinning differentiated multicellularity. This is because Haeckel's account and the models built upon it rely on the gradual specialization of same-species (or even different-species [76]) cell colonies or aggregations [37, 38, 30, 39, 40, 41, 42] while the developmental process starts from a single primordial cell (zygote or spore) or, in other words, "from the inside out". Because differentiated multicellularity is a single phenomenon whose evolution and self-regulation have been tackled by research under such divergent approaches, the resulting explanatory account is thus insufficiently substantiated as a whole.

Other, "non-epigenetic" hypotheses have been advanced aiming to explain the dynamics and/or informational requirements of cell-differentiation (which in turn could provide some hints on the evolution of multicellularity). One of them holds that spontaneous intercellular reaction-diffusion patterns are responsible for morphogenesis, and for cell differentiation as a consequence [33]. Although this model has been tested in terms of chemical differentiation of synthetic "cells" [77], it does not explain the critical relationship in which real differentiating/differentiated cells *serve* the individuated multicellular organism as a whole. Another hypothesis suggests that gene expression instability and stochasticity, in the context of external metabolic substrate gradients, create an intrinsic natural-selection-like mechanism able to drive the differentiation process [78]. A third "non-epigenetic" hypothesis is that cell fate decisions are the result of the characteristic coupling of gene expression and metabolism [79].

All of these accounts, however, fail to explain how traits or dynamics that supposedly account for the transition to multicellularity or to cell differentiation have fundamentally analogous counterparts in undifferentiated multicellular or unicellular eukaryotic lineages. They also fail to account for the information required by developmental decisions for information and in the transition between strictly single-cell-related content to additional multicellular-individual-related content. Further, they fail to explain the reproducible and robust self-regulatory dynamics of gene expression during cell differentiation. These approaches also cannot describe the transition between a highly complex or symbiotic cell population/aggregation and a differentiated multicellular organism, and they lack parsimony when encompassing both the evolution and self-regulation of differentiated multicellularity. Neither are they falsifiable.

In contrast to these current hypotheses, the falsifiable theory proposed here regards the multicellular organism as a higher-order system that emerges from proliferating undifferentiated cells and *then* is subject to natural selection. The theoretical development in this work is not based on the substrate-based concept of irreducible emergence (fundamentally refuted by Jaegwon Kim [80, 81]) but instead converged from the strict *explicitly-uncorrelated-dynamics* condition argued in the [introduction](#)) into what can be described as the constraint-based concept of emergence of unprecedented, higher-order teleological systems, pioneered in a broader perspective by Terrence Deacon in 2011 [31]. Importantly, this formulation of emergence does not

build upon the traditional concepts of *telos* or “final cause” but instead redefines the *telos* as a thermodynamically spontaneous, intrinsic constraint whose causal power is exerted at the present instant.

## Estimation of a lower bound for the necessary cell-fate information capacity in the hermaphrodite *Caenorhabditis elegans* ontogeny

| Count                                 |                                                                            | N <sup>o</sup>           |
|---------------------------------------|----------------------------------------------------------------------------|--------------------------|
| Cells generated                       |                                                                            | 1,090                    |
| Deaths in the process                 |                                                                            | 131                      |
| Final cells                           |                                                                            | 959                      |
| Cell types developed                  |                                                                            | 19                       |
| (Data source: WormAtlas website [82]) |                                                                            |                          |
|                                       | Estimated as                                                               | N <sup>o</sup> (approx.) |
| Total divisions                       | $2^{\log_2(\text{cells\_generated}+1)} - 1$                                | 2,179                    |
| Cell-fate divisions                   | $2^{\log_2(\text{cell\_types}+1)} - 1$                                     | 37                       |
| Non-cell-fate divisions               | $\text{total\_divisions} - (\text{cell\_fate\_divisions} + \text{deaths})$ | 2,011                    |
|                                       | Estimated as                                                               | $p$ $-p \log_2 p$        |
| Cell death                            | $\text{deaths} / \text{total\_divisions}$                                  | 0.060   0.244            |
| Non-cell-fate division                | $\text{non\_cell\_fate\_divisions} / \text{total\_divisions}$              | 0.923   0.107            |
| Cell-fate division                    | $\text{cell\_fate\_divisions} / \text{total\_divisions}$                   | 0.017   0.1              |
| Uncertainty per division (Sum)        |                                                                            | 0.451                    |
|                                       | Estimated as                                                               | (bit)                    |
| Uncertainty to resolve (total)        | $\text{uncertainty\_per\_division} \times \text{total\_divisions}$         | 983                      |

Note: germ line cells were excluded from the analysis.

## Stochastically independent dynamics

Let  $X_1, \dots, X_n$  be  $n$  discrete random variables representing certain dynamics of  $n$  thermodynamic systems respectively.

If  $H(X_i)$  is the Shannon entropy of  $X_i$ , then by joint Shannon entropy subadditivity [83], it is always true that

$$H(X_1, \dots, X_n) \leq H(X_1) + \dots + H(X_n).$$

These  $n$  dynamics will be *stochastically independent* if and only if

$$H(X_1, \dots, X_n) = H(X_1) + \dots + H(X_n)$$

or, in other words, if these  $n$  dynamics are explicitly uncorrelated.

If the relationships are linear, the condition of *stochastically independent* dynamics for two systems can be expressed as:

$$\text{Cov}(X_i, X_j) = 0$$

In general, the covariance of two random variables  $\{X_i, X_j\}$  can be decomposed in terms of their linear relationship with a third random variable  $X_k$  as follows:

$$\text{Cov}(X_i, X_j) = \underbrace{\frac{\text{Cov}(X_i, X_k)\text{Cov}(X_j, X_k)}{\text{Var}(X_k)}}_{\substack{\text{covariance of } X_i \text{ and } X_j \\ \text{resulting from their} \\ \text{linear relationship with } X_k}} + \underbrace{\text{Cov}(X_i, X_j|X_k)}_{\substack{\text{covariance of } X_i \text{ and } X_j \\ \text{orthogonal to } X_k}}. \quad (5)$$

Importantly, the dynamics of the two systems that respectively account for each summand above are *stochastically independent* (see also [Figure 2](#) and [Methods](#)).

$$\text{Cov}(X_i, Y_j) = \underbrace{\frac{\text{Cov}(X_i, Z)\text{Cov}(Y_j, Z)}{\text{Var}(Z)}}_{\substack{\text{covariance of } X_i \text{ and } Y_j \\ \text{resulting from their} \\ \text{linear relationship with } Z}} + \underbrace{\text{Cov}(X_i, Y_j|Z)}_{\substack{\text{covariance of } X_i \text{ and } Y_j \\ \text{orthogonal to } Z}}. \quad (6)$$

## Supplementary Information

### *Homo sapiens* source data of ChIP-seq on histone H3 modifications (BAM/BAI files) [62]

For downloading, the URL must be constructed by adding the following prefix to each file listed:

<ftp://hgdownload.cse.ucsc.edu/goldenPath/hg19/encodeDCC/wgEncodeBroadHistone/>

| Cell type | Antibody | GEO Accession | File URL suffix                                         |
|-----------|----------|---------------|---------------------------------------------------------|
| GM12878   | H3K27ac  | GSM733771     | wgEncodeBroadHistoneGm12878H3k27acStdA1nRep1.bam.bai    |
| GM12878   | H3K27ac  | GSM733771     | wgEncodeBroadHistoneGm12878H3k27acStdA1nRep1.bam        |
| GM12878   | H3K27ac  | GSM733771     | wgEncodeBroadHistoneGm12878H3k27acStdA1nRep2.bam.bai    |
| GM12878   | H3K27ac  | GSM733771     | wgEncodeBroadHistoneGm12878H3k27acStdA1nRep2.bam        |
| GM12878   | H3K27me3 | GSM733758     | wgEncodeBroadHistoneGm12878H3k27me3StdA1nRep1.bam.bai   |
| GM12878   | H3K27me3 | GSM733758     | wgEncodeBroadHistoneGm12878H3k27me3StdA1nRep1.bam       |
| GM12878   | H3K27me3 | GSM733758     | wgEncodeBroadHistoneGm12878H3k27me3StdA1nRep2.bam.bai   |
| GM12878   | H3K27me3 | GSM733758     | wgEncodeBroadHistoneGm12878H3k27me3StdA1nRep2.bam       |
| GM12878   | H3K27me3 | GSM733758     | wgEncodeBroadHistoneGm12878H3k27me3StdA1nRep3V2.bam.bai |
| GM12878   | H3K27me3 | GSM733758     | wgEncodeBroadHistoneGm12878H3k27me3StdA1nRep3V2.bam     |
| GM12878   | H3K36me3 | GSM733679     | wgEncodeBroadHistoneGm12878H3k36me3StdA1nRep1.bam.bai   |
| GM12878   | H3K36me3 | GSM733679     | wgEncodeBroadHistoneGm12878H3k36me3StdA1nRep1.bam       |
| GM12878   | H3K36me3 | GSM733679     | wgEncodeBroadHistoneGm12878H3k36me3StdA1nRep2.bam.bai   |
| GM12878   | H3K36me3 | GSM733679     | wgEncodeBroadHistoneGm12878H3k36me3StdA1nRep2.bam       |
| GM12878   | H3K4me1  | GSM733772     | wgEncodeBroadHistoneGm12878H3k4me1StdA1nRep2.bam.bai    |
| GM12878   | H3K4me1  | GSM733772     | wgEncodeBroadHistoneGm12878H3k4me1StdA1nRep2.bam        |
| GM12878   | H3K4me1  | GSM733772     | wgEncodeBroadHistoneGm12878H3k04me1StdA1nRep1V2.bam.bai |
| GM12878   | H3K4me1  | GSM733772     | wgEncodeBroadHistoneGm12878H3k04me1StdA1nRep1V2.bam     |
| GM12878   | H3K4me2  | GSM733769     | wgEncodeBroadHistoneGm12878H3k4me2StdA1nRep1.bam.bai    |
| GM12878   | H3K4me2  | GSM733769     | wgEncodeBroadHistoneGm12878H3k4me2StdA1nRep1.bam        |
| GM12878   | H3K4me2  | GSM733769     | wgEncodeBroadHistoneGm12878H3k4me2StdA1nRep2.bam.bai    |
| GM12878   | H3K4me2  | GSM733769     | wgEncodeBroadHistoneGm12878H3k4me2StdA1nRep2.bam        |
| GM12878   | H3K4me3  | GSM733708     | wgEncodeBroadHistoneGm12878H3k04me3StdA1nRep2V2.bam.bai |
| GM12878   | H3K4me3  | GSM733708     | wgEncodeBroadHistoneGm12878H3k04me3StdA1nRep2V2.bam     |
| GM12878   | H3K4me3  | GSM733708     | wgEncodeBroadHistoneGm12878H3k4me3StdA1nRep1.bam.bai    |
| GM12878   | H3K4me3  | GSM733708     | wgEncodeBroadHistoneGm12878H3k4me3StdA1nRep1.bam        |
| GM12878   | H3K79me2 | GSM733736     | wgEncodeBroadHistoneGm12878H3k79me2StdA1nRep1.bam.bai   |
| GM12878   | H3K79me2 | GSM733736     | wgEncodeBroadHistoneGm12878H3k79me2StdA1nRep1.bam       |
| GM12878   | H3K79me2 | GSM733736     | wgEncodeBroadHistoneGm12878H3k79me2StdA1nRep2.bam.bai   |
| GM12878   | H3K79me2 | GSM733736     | wgEncodeBroadHistoneGm12878H3k79me2StdA1nRep2.bam       |

Continued on next page



*Continued from previous page*

| Cell type | Antibody | GEO Accession | File URL suffix                                      |
|-----------|----------|---------------|------------------------------------------------------|
| GM12878   | H3K9ac   | GSM733677     | wgEncodeBroadHistoneGm12878H3k9acStdA1nRep1.bam.bai  |
| GM12878   | H3K9ac   | GSM733677     | wgEncodeBroadHistoneGm12878H3k9acStdA1nRep1.bam      |
| GM12878   | H3K9ac   | GSM733677     | wgEncodeBroadHistoneGm12878H3k9acStdA1nRep2.bam.bai  |
| GM12878   | H3K9ac   | GSM733677     | wgEncodeBroadHistoneGm12878H3k9acStdA1nRep2.bam      |
| GM12878   | H3K9me3  | GSM733664     | wgEncodeBroadHistoneGm12878H3k9me3StdA1nRep1.bam.bai |
| GM12878   | H3K9me3  | GSM733664     | wgEncodeBroadHistoneGm12878H3k9me3StdA1nRep1.bam     |
| GM12878   | H3K9me3  | GSM733664     | wgEncodeBroadHistoneGm12878H3k9me3StdA1nRep2.bam.bai |
| GM12878   | H3K9me3  | GSM733664     | wgEncodeBroadHistoneGm12878H3k9me3StdA1nRep2.bam     |
| GM12878   | H3K9me3  | GSM733664     | wgEncodeBroadHistoneGm12878H3k9me3StdA1nRep3.bam.bai |
| GM12878   | H3K9me3  | GSM733664     | wgEncodeBroadHistoneGm12878H3k9me3StdA1nRep3.bam     |
| GM12878   | Input    | GSM733742     | wgEncodeBroadHistoneGm12878ControlStdA1nRep1.bam.bai |
| GM12878   | Input    | GSM733742     | wgEncodeBroadHistoneGm12878ControlStdA1nRep1.bam     |
| GM12878   | Input    | GSM733742     | wgEncodeBroadHistoneGm12878ControlStdA1nRep2.bam.bai |
| GM12878   | Input    | GSM733742     | wgEncodeBroadHistoneGm12878ControlStdA1nRep2.bam     |
| HI-hESC   | H3K27ac  | GSM733718     | wgEncodeBroadHistoneH1hescH3k27acStdA1nRep1.bam.bai  |
| HI-hESC   | H3K27ac  | GSM733718     | wgEncodeBroadHistoneH1hescH3k27acStdA1nRep1.bam      |
| HI-hESC   | H3K27ac  | GSM733718     | wgEncodeBroadHistoneH1hescH3k27acStdA1nRep2.bam.bai  |
| HI-hESC   | H3K27ac  | GSM733718     | wgEncodeBroadHistoneH1hescH3k27acStdA1nRep2.bam      |
| HI-hESC   | H3K27me3 | GSM733748     | wgEncodeBroadHistoneH1hescH3k27me3StdA1nRep1.bam.bai |
| HI-hESC   | H3K27me3 | GSM733748     | wgEncodeBroadHistoneH1hescH3k27me3StdA1nRep1.bam     |
| HI-hESC   | H3K27me3 | GSM733748     | wgEncodeBroadHistoneH1hescH3k27me3StdA1nRep2.bam.bai |
| HI-hESC   | H3K27me3 | GSM733748     | wgEncodeBroadHistoneH1hescH3k27me3StdA1nRep2.bam     |
| HI-hESC   | H3K36me3 | GSM733725     | wgEncodeBroadHistoneH1hescH3k36me3StdA1nRep1.bam.bai |
| HI-hESC   | H3K36me3 | GSM733725     | wgEncodeBroadHistoneH1hescH3k36me3StdA1nRep1.bam     |
| HI-hESC   | H3K36me3 | GSM733725     | wgEncodeBroadHistoneH1hescH3k36me3StdA1nRep2.bam.bai |
| HI-hESC   | H3K36me3 | GSM733725     | wgEncodeBroadHistoneH1hescH3k36me3StdA1nRep2.bam     |
| HI-hESC   | H3K4me1  | GSM733782     | wgEncodeBroadHistoneH1hescH3k4me1StdA1nRep1.bam.bai  |
| HI-hESC   | H3K4me1  | GSM733782     | wgEncodeBroadHistoneH1hescH3k4me1StdA1nRep1.bam      |
| HI-hESC   | H3K4me1  | GSM733782     | wgEncodeBroadHistoneH1hescH3k4me1StdA1nRep2.bam.bai  |
| HI-hESC   | H3K4me1  | GSM733782     | wgEncodeBroadHistoneH1hescH3k4me1StdA1nRep2.bam      |
| HI-hESC   | H3K4me2  | GSM733670     | wgEncodeBroadHistoneH1hescH3k4me2StdA1nRep1.bam.bai  |
| HI-hESC   | H3K4me2  | GSM733670     | wgEncodeBroadHistoneH1hescH3k4me2StdA1nRep1.bam      |
| HI-hESC   | H3K4me2  | GSM733670     | wgEncodeBroadHistoneH1hescH3k4me2StdA1nRep2.bam.bai  |
| HI-hESC   | H3K4me2  | GSM733670     | wgEncodeBroadHistoneH1hescH3k4me2StdA1nRep2.bam      |
| HI-hESC   | H3K4me3  | GSM733657     | wgEncodeBroadHistoneH1hescH3k4me3StdA1nRep1.bam.bai  |
| HI-hESC   | H3K4me3  | GSM733657     | wgEncodeBroadHistoneH1hescH3k4me3StdA1nRep1.bam      |
| HI-hESC   | H3K4me3  | GSM733657     | wgEncodeBroadHistoneH1hescH3k4me3StdA1nRep2.bam.bai  |

*Continued on next page*

*Continued from previous page*

| Cell type | Antibody | GEO Accession | File URL suffix                                      |
|-----------|----------|---------------|------------------------------------------------------|
| HI-hESC   | H3K4me3  | GSM733657     | wgEncodeBroadHistoneH1hesch3k4me3StdA1nRep2.bam      |
| HI-hESC   | H3K79me2 | GSM1003547    | wgEncodeBroadHistoneH1hesch3k79me2StdA1nRep1.bam.bai |
| HI-hESC   | H3K79me2 | GSM1003547    | wgEncodeBroadHistoneH1hesch3k79me2StdA1nRep1.bam     |
| HI-hESC   | H3K79me2 | GSM1003547    | wgEncodeBroadHistoneH1hesch3k79me2StdA1nRep2.bam.bai |
| HI-hESC   | H3K79me2 | GSM1003547    | wgEncodeBroadHistoneH1hesch3k79me2StdA1nRep2.bam     |
| HI-hESC   | H3K9ac   | GSM733773     | wgEncodeBroadHistoneH1hesch3k9acStdA1nRep1.bam.bai   |
| HI-hESC   | H3K9ac   | GSM733773     | wgEncodeBroadHistoneH1hesch3k9acStdA1nRep1.bam       |
| HI-hESC   | H3K9ac   | GSM733773     | wgEncodeBroadHistoneH1hesch3k9acStdA1nRep2.bam.bai   |
| HI-hESC   | H3K9ac   | GSM733773     | wgEncodeBroadHistoneH1hesch3k9acStdA1nRep2.bam       |
| HI-hESC   | H3K9me3  | GSM1003585    | wgEncodeBroadHistoneH1hesch3k09me3StdA1nRep1.bam.bai |
| HI-hESC   | H3K9me3  | GSM1003585    | wgEncodeBroadHistoneH1hesch3k09me3StdA1nRep1.bam     |
| HI-hESC   | H3K9me3  | GSM1003585    | wgEncodeBroadHistoneH1hesch3k09me3StdA1nRep2.bam.bai |
| HI-hESC   | H3K9me3  | GSM1003585    | wgEncodeBroadHistoneH1hesch3k09me3StdA1nRep2.bam     |
| HI-hESC   | Input    | GSM733770     | wgEncodeBroadHistoneH1hescControlStdA1nRep1.bam.bai  |
| HI-hESC   | Input    | GSM733770     | wgEncodeBroadHistoneH1hescControlStdA1nRep1.bam      |
| HI-hESC   | Input    | GSM733770     | wgEncodeBroadHistoneH1hescControlStdA1nRep2.bam.bai  |
| HI-hESC   | Input    | GSM733770     | wgEncodeBroadHistoneH1hescControlStdA1nRep2.bam      |
| HSMM      | H3K27ac  | GSM733755     | wgEncodeBroadHistoneHsmmH3k27acStdA1nRep1.bam.bai    |
| HSMM      | H3K27ac  | GSM733755     | wgEncodeBroadHistoneHsmmH3k27acStdA1nRep1.bam        |
| HSMM      | H3K27ac  | GSM733755     | wgEncodeBroadHistoneHsmmH3k27acStdA1nRep2.bam.bai    |
| HSMM      | H3K27ac  | GSM733755     | wgEncodeBroadHistoneHsmmH3k27acStdA1nRep2.bam        |
| HSMM      | H3K27me3 | GSM733667     | wgEncodeBroadHistoneHsmmH3k27me3StdA1nRep1.bam.bai   |
| HSMM      | H3K27me3 | GSM733667     | wgEncodeBroadHistoneHsmmH3k27me3StdA1nRep1.bam       |
| HSMM      | H3K27me3 | GSM733667     | wgEncodeBroadHistoneHsmmH3k27me3StdA1nRep2.bam.bai   |
| HSMM      | H3K27me3 | GSM733667     | wgEncodeBroadHistoneHsmmH3k27me3StdA1nRep2.bam       |
| HSMM      | H3K36me3 | GSM733702     | wgEncodeBroadHistoneHsmmH3k36me3StdA1nRep1.bam.bai   |
| HSMM      | H3K36me3 | GSM733702     | wgEncodeBroadHistoneHsmmH3k36me3StdA1nRep1.bam       |
| HSMM      | H3K36me3 | GSM733702     | wgEncodeBroadHistoneHsmmH3k36me3StdA1nRep2.bam.bai   |
| HSMM      | H3K36me3 | GSM733702     | wgEncodeBroadHistoneHsmmH3k36me3StdA1nRep2.bam       |
| HSMM      | H3K4me1  | GSM733761     | wgEncodeBroadHistoneHsmmH3k4me1StdA1nRep1.bam.bai    |
| HSMM      | H3K4me1  | GSM733761     | wgEncodeBroadHistoneHsmmH3k4me1StdA1nRep1.bam        |
| HSMM      | H3K4me1  | GSM733761     | wgEncodeBroadHistoneHsmmH3k4me1StdA1nRep2.bam.bai    |
| HSMM      | H3K4me1  | GSM733761     | wgEncodeBroadHistoneHsmmH3k4me1StdA1nRep2.bam        |
| HSMM      | H3K4me2  | GSM733768     | wgEncodeBroadHistoneHsmmH3k4me2StdA1nRep1.bam.bai    |
| HSMM      | H3K4me2  | GSM733768     | wgEncodeBroadHistoneHsmmH3k4me2StdA1nRep1.bam        |
| HSMM      | H3K4me2  | GSM733768     | wgEncodeBroadHistoneHsmmH3k4me2StdA1nRep2.bam.bai    |
| HSMM      | H3K4me2  | GSM733768     | wgEncodeBroadHistoneHsmmH3k4me2StdA1nRep2.bam        |

*Continued on next page*

*Continued from previous page*

| Cell type | Antibody | GEO Accession | File URL suffix                                     |
|-----------|----------|---------------|-----------------------------------------------------|
| HSMM      | H3K4me3  | GSM733637     | wgEncodeBroadHistoneHsmmH3k4me3StdA1nRep1.bam.bai   |
| HSMM      | H3K4me3  | GSM733637     | wgEncodeBroadHistoneHsmmH3k4me3StdA1nRep1.bam       |
| HSMM      | H3K4me3  | GSM733637     | wgEncodeBroadHistoneHsmmH3k4me3StdA1nRep2.bam.bai   |
| HSMM      | H3K4me3  | GSM733637     | wgEncodeBroadHistoneHsmmH3k4me3StdA1nRep2.bam       |
| HSMM      | H3K79me2 | GSM733741     | wgEncodeBroadHistoneHsmmH3k79me2StdA1nRep1.bam.bai  |
| HSMM      | H3K79me2 | GSM733741     | wgEncodeBroadHistoneHsmmH3k79me2StdA1nRep1.bam      |
| HSMM      | H3K79me2 | GSM733741     | wgEncodeBroadHistoneHsmmH3k79me2StdA1nRep2.bam.bai  |
| HSMM      | H3K79me2 | GSM733741     | wgEncodeBroadHistoneHsmmH3k79me2StdA1nRep2.bam      |
| HSMM      | H3K9ac   | GSM733775     | wgEncodeBroadHistoneHsmmH3k9acStdA1nRep1.bam.bai    |
| HSMM      | H3K9ac   | GSM733775     | wgEncodeBroadHistoneHsmmH3k9acStdA1nRep1.bam        |
| HSMM      | H3K9ac   | GSM733775     | wgEncodeBroadHistoneHsmmH3k9acStdA1nRep2.bam.bai    |
| HSMM      | H3K9ac   | GSM733775     | wgEncodeBroadHistoneHsmmH3k9acStdA1nRep2.bam        |
| HSMM      | H3K9me3  | GSM733730     | wgEncodeBroadHistoneHsmmH3k9me3StdA1nRep1.bam.bai   |
| HSMM      | H3K9me3  | GSM733730     | wgEncodeBroadHistoneHsmmH3k9me3StdA1nRep1.bam       |
| HSMM      | H3K9me3  | GSM733730     | wgEncodeBroadHistoneHsmmH3k9me3StdA1nRep2.bam.bai   |
| HSMM      | H3K9me3  | GSM733730     | wgEncodeBroadHistoneHsmmH3k9me3StdA1nRep2.bam       |
| HSMM      | Input    | GSM733663     | wgEncodeBroadHistoneHsmmControlStdA1nRep1.bam.bai   |
| HSMM      | Input    | GSM733663     | wgEncodeBroadHistoneHsmmControlStdA1nRep1.bam       |
| HSMM      | Input    | GSM733663     | wgEncodeBroadHistoneHsmmControlStdA1nRep2.bam.bai   |
| HSMM      | Input    | GSM733663     | wgEncodeBroadHistoneHsmmControlStdA1nRep2.bam       |
| HUVEC     | H3K27ac  | GSM733691     | wgEncodeBroadHistoneHuvecH3k27acStdA1nRep1.bam.bai  |
| HUVEC     | H3K27ac  | GSM733691     | wgEncodeBroadHistoneHuvecH3k27acStdA1nRep1.bam      |
| HUVEC     | H3K27ac  | GSM733691     | wgEncodeBroadHistoneHuvecH3k27acStdA1nRep2.bam.bai  |
| HUVEC     | H3K27ac  | GSM733691     | wgEncodeBroadHistoneHuvecH3k27acStdA1nRep2.bam      |
| HUVEC     | H3K27ac  | GSM733691     | wgEncodeBroadHistoneHuvecH3k27acStdA1nRep3.bam.bai  |
| HUVEC     | H3K27ac  | GSM733691     | wgEncodeBroadHistoneHuvecH3k27acStdA1nRep3.bam      |
| HUVEC     | H3K27me3 | GSM733688     | wgEncodeBroadHistoneHuvecH3k27me3StdA1nRep1.bam.bai |
| HUVEC     | H3K27me3 | GSM733688     | wgEncodeBroadHistoneHuvecH3k27me3StdA1nRep1.bam     |
| HUVEC     | H3K27me3 | GSM733688     | wgEncodeBroadHistoneHuvecH3k27me3StdA1nRep2.bam.bai |
| HUVEC     | H3K27me3 | GSM733688     | wgEncodeBroadHistoneHuvecH3k27me3StdA1nRep2.bam     |
| HUVEC     | H3K36me3 | GSM733757     | wgEncodeBroadHistoneHuvecH3k36me3StdA1nRep1.bam.bai |
| HUVEC     | H3K36me3 | GSM733757     | wgEncodeBroadHistoneHuvecH3k36me3StdA1nRep1.bam     |
| HUVEC     | H3K36me3 | GSM733757     | wgEncodeBroadHistoneHuvecH3k36me3StdA1nRep2.bam.bai |
| HUVEC     | H3K36me3 | GSM733757     | wgEncodeBroadHistoneHuvecH3k36me3StdA1nRep2.bam     |
| HUVEC     | H3K36me3 | GSM733757     | wgEncodeBroadHistoneHuvecH3k36me3StdA1nRep3.bam.bai |
| HUVEC     | H3K36me3 | GSM733757     | wgEncodeBroadHistoneHuvecH3k36me3StdA1nRep3.bam     |
| HUVEC     | H3K4me1  | GSM733690     | wgEncodeBroadHistoneHuvecH3k4me1StdA1nRep1.bam.bai  |

*Continued on next page*

*Continued from previous page*

| Cell type | Antibody | GEO Accession | File URL suffix                                    |
|-----------|----------|---------------|----------------------------------------------------|
| HUVEC     | H3K4me1  | GSM733690     | wgEncodeBroadHistoneHuvecH3k4me1StdA1nRep1.bam     |
| HUVEC     | H3K4me1  | GSM733690     | wgEncodeBroadHistoneHuvecH3k4me1StdA1nRep2.bam.bai |
| HUVEC     | H3K4me1  | GSM733690     | wgEncodeBroadHistoneHuvecH3k4me1StdA1nRep2.bam     |
| HUVEC     | H3K4me1  | GSM733690     | wgEncodeBroadHistoneHuvecH3k4me1StdA1nRep3.bam.bai |
| HUVEC     | H3K4me1  | GSM733690     | wgEncodeBroadHistoneHuvecH3k4me1StdA1nRep3.bam     |
| HUVEC     | H3K4me2  | GSM733683     | wgEncodeBroadHistoneHuvecH3k4me2StdA1nRep1.bam.bai |
| HUVEC     | H3K4me2  | GSM733683     | wgEncodeBroadHistoneHuvecH3k4me2StdA1nRep1.bam     |
| HUVEC     | H3K4me2  | GSM733683     | wgEncodeBroadHistoneHuvecH3k4me2StdA1nRep2.bam.bai |
| HUVEC     | H3K4me2  | GSM733683     | wgEncodeBroadHistoneHuvecH3k4me2StdA1nRep2.bam     |
| HUVEC     | H3K4me3  | GSM733673     | wgEncodeBroadHistoneHuvecH3k4me3StdA1nRep1.bam.bai |
| HUVEC     | H3K4me3  | GSM733673     | wgEncodeBroadHistoneHuvecH3k4me3StdA1nRep1.bam     |
| HUVEC     | H3K4me3  | GSM733673     | wgEncodeBroadHistoneHuvecH3k4me3StdA1nRep2.bam.bai |
| HUVEC     | H3K4me3  | GSM733673     | wgEncodeBroadHistoneHuvecH3k4me3StdA1nRep2.bam     |
| HUVEC     | H3K4me3  | GSM733673     | wgEncodeBroadHistoneHuvecH3k4me3StdA1nRep3.bam.bai |
| HUVEC     | H3K4me3  | GSM733673     | wgEncodeBroadHistoneHuvecH3k4me3StdA1nRep3.bam     |
| HUVEC     | H3K79me2 | GSM1003555    | wgEncodeBroadHistoneHuvecH3k79me2A1nRep1.bam.bai   |
| HUVEC     | H3K79me2 | GSM1003555    | wgEncodeBroadHistoneHuvecH3k79me2A1nRep1.bam       |
| HUVEC     | H3K79me2 | GSM1003555    | wgEncodeBroadHistoneHuvecH3k79me2A1nRep2.bam.bai   |
| HUVEC     | H3K79me2 | GSM1003555    | wgEncodeBroadHistoneHuvecH3k79me2A1nRep2.bam       |
| HUVEC     | H3K9ac   | GSM733735     | wgEncodeBroadHistoneHuvecH3k9acStdA1nRep1.bam.bai  |
| HUVEC     | H3K9ac   | GSM733735     | wgEncodeBroadHistoneHuvecH3k9acStdA1nRep1.bam      |
| HUVEC     | H3K9ac   | GSM733735     | wgEncodeBroadHistoneHuvecH3k9acStdA1nRep2.bam.bai  |
| HUVEC     | H3K9ac   | GSM733735     | wgEncodeBroadHistoneHuvecH3k9acStdA1nRep2.bam      |
| HUVEC     | H3K9ac   | GSM733735     | wgEncodeBroadHistoneHuvecH3k9acStdA1nRep3.bam.bai  |
| HUVEC     | H3K9ac   | GSM733735     | wgEncodeBroadHistoneHuvecH3k9acStdA1nRep3.bam      |
| HUVEC     | H3K9me3  | GSM1003517    | wgEncodeBroadHistoneHuvecH3k09me3A1nRep1.bam.bai   |
| HUVEC     | H3K9me3  | GSM1003517    | wgEncodeBroadHistoneHuvecH3k09me3A1nRep1.bam       |
| HUVEC     | H3K9me3  | GSM1003517    | wgEncodeBroadHistoneHuvecH3k09me3A1nRep2.bam.bai   |
| HUVEC     | H3K9me3  | GSM1003517    | wgEncodeBroadHistoneHuvecH3k09me3A1nRep2.bam       |
| HUVEC     | Input    | GSM733715     | wgEncodeBroadHistoneHuvecControlStdA1nRep1.bam.bai |
| HUVEC     | Input    | GSM733715     | wgEncodeBroadHistoneHuvecControlStdA1nRep1.bam     |
| HUVEC     | Input    | GSM733715     | wgEncodeBroadHistoneHuvecControlStdA1nRep2.bam.bai |
| HUVEC     | Input    | GSM733715     | wgEncodeBroadHistoneHuvecControlStdA1nRep2.bam     |
| HUVEC     | Input    | GSM733715     | wgEncodeBroadHistoneHuvecControlStdA1nRep3.bam.bai |
| HUVEC     | Input    | GSM733715     | wgEncodeBroadHistoneHuvecControlStdA1nRep3.bam     |
| NHEK      | H3K27ac  | GSM733674     | wgEncodeBroadHistoneNhekh3k27acStdA1nRep1.bam.bai  |
| NHEK      | H3K27ac  | GSM733674     | wgEncodeBroadHistoneNhekh3k27acStdA1nRep1.bam      |

*Continued on next page*

*Continued from previous page*

| Cell type | Antibody | GEO Accession | File URL suffix                                    |
|-----------|----------|---------------|----------------------------------------------------|
| NHEK      | H3K27ac  | GSM733674     | wgEncodeBroadHistoneNhekH3k27acStdA1nRep2.bam.bai  |
| NHEK      | H3K27ac  | GSM733674     | wgEncodeBroadHistoneNhekH3k27acStdA1nRep2.bam      |
| NHEK      | H3K27ac  | GSM733674     | wgEncodeBroadHistoneNhekH3k27acStdA1nRep3.bam.bai  |
| NHEK      | H3K27ac  | GSM733674     | wgEncodeBroadHistoneNhekH3k27acStdA1nRep3.bam      |
| NHEK      | H3K27me3 | GSM733701     | wgEncodeBroadHistoneNhekH3k27me3StdA1nRep1.bam.bai |
| NHEK      | H3K27me3 | GSM733701     | wgEncodeBroadHistoneNhekH3k27me3StdA1nRep1.bam     |
| NHEK      | H3K27me3 | GSM733701     | wgEncodeBroadHistoneNhekH3k27me3StdA1nRep2.bam.bai |
| NHEK      | H3K27me3 | GSM733701     | wgEncodeBroadHistoneNhekH3k27me3StdA1nRep2.bam     |
| NHEK      | H3K27me3 | GSM733701     | wgEncodeBroadHistoneNhekH3k27me3StdA1nRep3.bam.bai |
| NHEK      | H3K27me3 | GSM733701     | wgEncodeBroadHistoneNhekH3k27me3StdA1nRep3.bam     |
| NHEK      | H3K36me3 | GSM733726     | wgEncodeBroadHistoneNhekH3k36me3StdA1nRep1.bam.bai |
| NHEK      | H3K36me3 | GSM733726     | wgEncodeBroadHistoneNhekH3k36me3StdA1nRep1.bam     |
| NHEK      | H3K36me3 | GSM733726     | wgEncodeBroadHistoneNhekH3k36me3StdA1nRep2.bam.bai |
| NHEK      | H3K36me3 | GSM733726     | wgEncodeBroadHistoneNhekH3k36me3StdA1nRep2.bam     |
| NHEK      | H3K36me3 | GSM733726     | wgEncodeBroadHistoneNhekH3k36me3StdA1nRep3.bam.bai |
| NHEK      | H3K36me3 | GSM733726     | wgEncodeBroadHistoneNhekH3k36me3StdA1nRep3.bam     |
| NHEK      | H3K4me1  | GSM733698     | wgEncodeBroadHistoneNhekH3k4me1StdA1nRep1.bam.bai  |
| NHEK      | H3K4me1  | GSM733698     | wgEncodeBroadHistoneNhekH3k4me1StdA1nRep1.bam      |
| NHEK      | H3K4me1  | GSM733698     | wgEncodeBroadHistoneNhekH3k4me1StdA1nRep2.bam.bai  |
| NHEK      | H3K4me1  | GSM733698     | wgEncodeBroadHistoneNhekH3k4me1StdA1nRep2.bam      |
| NHEK      | H3K4me1  | GSM733698     | wgEncodeBroadHistoneNhekH3k4me1StdA1nRep3.bam.bai  |
| NHEK      | H3K4me1  | GSM733698     | wgEncodeBroadHistoneNhekH3k4me1StdA1nRep3.bam      |
| NHEK      | H3K4me2  | GSM733686     | wgEncodeBroadHistoneNhekH3k4me2StdA1nRep1.bam.bai  |
| NHEK      | H3K4me2  | GSM733686     | wgEncodeBroadHistoneNhekH3k4me2StdA1nRep1.bam      |
| NHEK      | H3K4me2  | GSM733686     | wgEncodeBroadHistoneNhekH3k4me2StdA1nRep2.bam.bai  |
| NHEK      | H3K4me2  | GSM733686     | wgEncodeBroadHistoneNhekH3k4me2StdA1nRep2.bam      |
| NHEK      | H3K4me2  | GSM733686     | wgEncodeBroadHistoneNhekH3k4me2StdA1nRep3.bam.bai  |
| NHEK      | H3K4me2  | GSM733686     | wgEncodeBroadHistoneNhekH3k4me2StdA1nRep3.bam      |
| NHEK      | H3K4me3  | GSM733720     | wgEncodeBroadHistoneNhekH3k4me3StdA1nRep1.bam.bai  |
| NHEK      | H3K4me3  | GSM733720     | wgEncodeBroadHistoneNhekH3k4me3StdA1nRep1.bam      |
| NHEK      | H3K4me3  | GSM733720     | wgEncodeBroadHistoneNhekH3k4me3StdA1nRep2.bam.bai  |
| NHEK      | H3K4me3  | GSM733720     | wgEncodeBroadHistoneNhekH3k4me3StdA1nRep2.bam      |
| NHEK      | H3K4me3  | GSM733720     | wgEncodeBroadHistoneNhekH3k4me3StdA1nRep3.bam.bai  |
| NHEK      | H3K4me3  | GSM733720     | wgEncodeBroadHistoneNhekH3k4me3StdA1nRep3.bam      |
| NHEK      | H3K79me2 | GSM1003527    | wgEncodeBroadHistoneNhekH3k79me2A1nRep1.bam.bai    |
| NHEK      | H3K79me2 | GSM1003527    | wgEncodeBroadHistoneNhekH3k79me2A1nRep1.bam        |
| NHEK      | H3K79me2 | GSM1003527    | wgEncodeBroadHistoneNhekH3k79me2A1nRep2.bam.bai    |

*Continued on next page*

*Continued from previous page*

| Cell type | Antibody | GEO Accession | File URL suffix                                   |
|-----------|----------|---------------|---------------------------------------------------|
| NHEK      | H3K79me2 | GSM1003527    | wgEncodeBroadHistoneNhekH3k79me2A1nRep2.bam       |
| NHEK      | H3K9ac   | GSM733665     | wgEncodeBroadHistoneNhekH3k9acStdA1nRep1.bam.bai  |
| NHEK      | H3K9ac   | GSM733665     | wgEncodeBroadHistoneNhekH3k9acStdA1nRep1.bam      |
| NHEK      | H3K9ac   | GSM733665     | wgEncodeBroadHistoneNhekH3k9acStdA1nRep2.bam.bai  |
| NHEK      | H3K9ac   | GSM733665     | wgEncodeBroadHistoneNhekH3k9acStdA1nRep2.bam      |
| NHEK      | H3K9ac   | GSM733665     | wgEncodeBroadHistoneNhekH3k9acStdA1nRep3.bam.bai  |
| NHEK      | H3K9ac   | GSM733665     | wgEncodeBroadHistoneNhekH3k9acStdA1nRep3.bam      |
| NHEK      | H3K9me3  | GSM1003528    | wgEncodeBroadHistoneNhekH3k09me3A1nRep1.bam.bai   |
| NHEK      | H3K9me3  | GSM1003528    | wgEncodeBroadHistoneNhekH3k09me3A1nRep1.bam       |
| NHEK      | H3K9me3  | GSM1003528    | wgEncodeBroadHistoneNhekH3k09me3A1nRep2.bam.bai   |
| NHEK      | H3K9me3  | GSM1003528    | wgEncodeBroadHistoneNhekH3k09me3A1nRep2.bam       |
| NHEK      | Input    | GSM733740     | wgEncodeBroadHistoneNhekControlStdA1nRep1.bam.bai |
| NHEK      | Input    | GSM733740     | wgEncodeBroadHistoneNhekControlStdA1nRep1.bam     |
| NHEK      | Input    | GSM733740     | wgEncodeBroadHistoneNhekControlStdA1nRep2.bam.bai |
| NHEK      | Input    | GSM733740     | wgEncodeBroadHistoneNhekControlStdA1nRep2.bam     |
| NHLF      | H3K27ac  | GSM733646     | wgEncodeBroadHistoneNhlH3k27acStdA1nRep1.bam.bai  |
| NHLF      | H3K27ac  | GSM733646     | wgEncodeBroadHistoneNhlH3k27acStdA1nRep1.bam      |
| NHLF      | H3K27ac  | GSM733646     | wgEncodeBroadHistoneNhlH3k27acStdA1nRep2.bam.bai  |
| NHLF      | H3K27ac  | GSM733646     | wgEncodeBroadHistoneNhlH3k27acStdA1nRep2.bam      |
| NHLF      | H3K27me3 | GSM733764     | wgEncodeBroadHistoneNhlH3k27me3StdA1nRep1.bam.bai |
| NHLF      | H3K27me3 | GSM733764     | wgEncodeBroadHistoneNhlH3k27me3StdA1nRep1.bam     |
| NHLF      | H3K27me3 | GSM733764     | wgEncodeBroadHistoneNhlH3k27me3StdA1nRep2.bam.bai |
| NHLF      | H3K27me3 | GSM733764     | wgEncodeBroadHistoneNhlH3k27me3StdA1nRep2.bam     |
| NHLF      | H3K36me3 | GSM733699     | wgEncodeBroadHistoneNhlH3k36me3StdA1nRep1.bam.bai |
| NHLF      | H3K36me3 | GSM733699     | wgEncodeBroadHistoneNhlH3k36me3StdA1nRep1.bam     |
| NHLF      | H3K36me3 | GSM733699     | wgEncodeBroadHistoneNhlH3k36me3StdA1nRep2.bam.bai |
| NHLF      | H3K36me3 | GSM733699     | wgEncodeBroadHistoneNhlH3k36me3StdA1nRep2.bam     |
| NHLF      | H3K4me1  | GSM733649     | wgEncodeBroadHistoneNhlH3k4me1StdA1nRep1.bam.bai  |
| NHLF      | H3K4me1  | GSM733649     | wgEncodeBroadHistoneNhlH3k4me1StdA1nRep1.bam      |
| NHLF      | H3K4me1  | GSM733649     | wgEncodeBroadHistoneNhlH3k4me1StdA1nRep2.bam.bai  |
| NHLF      | H3K4me1  | GSM733649     | wgEncodeBroadHistoneNhlH3k4me1StdA1nRep2.bam      |
| NHLF      | H3K4me2  | GSM733781     | wgEncodeBroadHistoneNhlH3k4me2StdA1nRep1.bam.bai  |
| NHLF      | H3K4me2  | GSM733781     | wgEncodeBroadHistoneNhlH3k4me2StdA1nRep1.bam      |
| NHLF      | H3K4me2  | GSM733781     | wgEncodeBroadHistoneNhlH3k4me2StdA1nRep2.bam.bai  |
| NHLF      | H3K4me2  | GSM733781     | wgEncodeBroadHistoneNhlH3k4me2StdA1nRep2.bam      |
| NHLF      | H3K4me3  | GSM733723     | wgEncodeBroadHistoneNhlH3k4me3StdA1nRep1.bam.bai  |
| NHLF      | H3K4me3  | GSM733723     | wgEncodeBroadHistoneNhlH3k4me3StdA1nRep1.bam      |

*Continued on next page*

*Continued from previous page*

| Cell type | Antibody | GEO Accession | File URL suffix                                   |
|-----------|----------|---------------|---------------------------------------------------|
| NHLF      | H3K4me3  | GSM733723     | wgEncodeBroadHistoneNh1fH3k4me3StdA1nRep2.bam.bai |
| NHLF      | H3K4me3  | GSM733723     | wgEncodeBroadHistoneNh1fH3k4me3StdA1nRep2.bam     |
| NHLF      | H3K79me2 | GSM1003549    | wgEncodeBroadHistoneNh1fH3k79me2A1nRep1.bam.bai   |
| NHLF      | H3K79me2 | GSM1003549    | wgEncodeBroadHistoneNh1fH3k79me2A1nRep1.bam       |
| NHLF      | H3K79me2 | GSM1003549    | wgEncodeBroadHistoneNh1fH3k79me2A1nRep2.bam.bai   |
| NHLF      | H3K79me2 | GSM1003549    | wgEncodeBroadHistoneNh1fH3k79me2A1nRep2.bam       |
| NHLF      | H3K9ac   | GSM733652     | wgEncodeBroadHistoneNh1fH3k9acStdA1nRep1.bam.bai  |
| NHLF      | H3K9ac   | GSM733652     | wgEncodeBroadHistoneNh1fH3k9acStdA1nRep1.bam      |
| NHLF      | H3K9ac   | GSM733652     | wgEncodeBroadHistoneNh1fH3k9acStdA1nRep2.bam.bai  |
| NHLF      | H3K9ac   | GSM733652     | wgEncodeBroadHistoneNh1fH3k9acStdA1nRep2.bam      |
| NHLF      | H3K9me3  | GSM1003531    | wgEncodeBroadHistoneNh1fH3k09me3A1nRep1.bam.bai   |
| NHLF      | H3K9me3  | GSM1003531    | wgEncodeBroadHistoneNh1fH3k09me3A1nRep1.bam       |
| NHLF      | H3K9me3  | GSM1003531    | wgEncodeBroadHistoneNh1fH3k09me3A1nRep2.bam.bai   |
| NHLF      | H3K9me3  | GSM1003531    | wgEncodeBroadHistoneNh1fH3k09me3A1nRep2.bam       |
| NHLF      | Input    | GSM733731     | wgEncodeBroadHistoneNh1fControlStdA1nRep1.bam.bai |
| NHLF      | Input    | GSM733731     | wgEncodeBroadHistoneNh1fControlStdA1nRep1.bam     |
| NHLF      | Input    | GSM733731     | wgEncodeBroadHistoneNh1fControlStdA1nRep2.bam.bai |
| NHLF      | Input    | GSM733731     | wgEncodeBroadHistoneNh1fControlStdA1nRep2.bam     |

## ***Homo sapiens* source data of RNA-seq transcript abundance in FPKM (GTF files) [66]**

For downloading, the URL must be constructed by adding the following prefix to each file listed:

<ftp://hgdownload.cse.ucsc.edu/goldenPath/hg19/encodeDCC/wgEncodeCaltechRnaSeq/>

| Cell type | GEO Accession | File URL suffix                                        |
|-----------|---------------|--------------------------------------------------------|
| GM12878   | GSM958728     | wgEncodeCaltechRnaSeqGm12878R2x75I1200TSSRep1V3.gtf.gz |
| GM12878   | GSM958728     | wgEncodeCaltechRnaSeqGm12878R2x75I1200TSSRep2V3.gtf.gz |
| H1-hESC   | GSM958733     | wgEncodeCaltechRnaSeqH1hescR2x75I1200TSSRep1V3.gtf.gz  |
| H1-hESC   | GSM958733     | wgEncodeCaltechRnaSeqH1hescR2x75I1200TSSRep2V3.gtf.gz  |
| H1-hESC   | GSM958733     | wgEncodeCaltechRnaSeqH1hescR2x75I1200TSSRep3V3.gtf.gz  |
| H1-hESC   | GSM958733     | wgEncodeCaltechRnaSeqH1hescR2x75I1200TSSRep4V3.gtf.gz  |
| HSMM      | GSM958744     | wgEncodeCaltechRnaSeqHsmmR2x75I1200TSSRep1V3.gtf.gz    |
| HSMM      | GSM958744     | wgEncodeCaltechRnaSeqHsmmR2x75I1200TSSRep2V3.gtf.gz    |
| HUVEC     | GSM958734     | wgEncodeCaltechRnaSeqHuvecR2x75I1200TSSRep1V3.gtf.gz   |

*Continued on next page*

*Continued from previous page*

| Cell type | GEO Accession | File URL suffix                                      |
|-----------|---------------|------------------------------------------------------|
| HUVEC     | GSM958734     | wgEncodeCaltechRnaSeqHuvecR2x75I1200TSSRep2V3.gtf.gz |
| NHEK      | GSM958736     | wgEncodeCaltechRnaSeqNhekR2x75I1200TSSRep1V3.gtf.gz  |
| NHEK      | GSM958736     | wgEncodeCaltechRnaSeqNhekR2x75I1200TSSRep2V3.gtf.gz  |
| NHLF      | GSM958746     | wgEncodeCaltechRnaSeqNh1fR2x75I1200TSSRep1V3.gtf.gz  |
| NHLF      | GSM958746     | wgEncodeCaltechRnaSeqNh1fR2x75I1200TSSRep2V3.gtf.gz  |

### ***Mus musculus* source data of ChIP-seq on histone H3 modifications (SRA files) [67, 65]**

For downloading, the URL must be constructed by adding the following prefix to each file listed:

<ftp://ftp-trace.ncbi.nlm.nih.gov/sra/sra-instant/reads/ByRun/sra/SRR/>

| Cell type       | Antibody | Rep # | GEO Accession | File URL suffix                |
|-----------------|----------|-------|---------------|--------------------------------|
| E14             | IgG      | 1     | GSM881345     | SRR414/SRR414932/SRR414932.sra |
| E14-day0        | H3K27ac  | 1     | GSM881349     | SRR414/SRR414936/SRR414936.sra |
| E14-day0        | H3K27me3 | 1     | GSM881350     | SRR414/SRR414937/SRR414937.sra |
| E14-day0        | H3K36me3 | 1     | GSM881351     | SRR414/SRR414938/SRR414938.sra |
| E14-day0        | H3K4me1  | 1     | GSM881352     | SRR414/SRR414939/SRR414939.sra |
| E14-day0        | H3K4me3  | 1     | GSM881354     | SRR414/SRR414941/SRR414941.sra |
| E14-day4        | H3K27ac  | 1     | GSM881357     | SRR414/SRR414945/SRR414945.sra |
| E14-day4        | H3K27me3 | 1     | GSM881358     | SRR414/SRR414946/SRR414946.sra |
| E14-day4        | H3K36me3 | 1     | GSM881359     | SRR414/SRR414947/SRR414947.sra |
| E14-day4        | H3K4me1  | 1     | GSM881360     | SRR414/SRR414948/SRR414948.sra |
| E14-day4        | H3K4me3  | 1     | GSM881362     | SRR414/SRR414950/SRR414950.sra |
| E14-day6        | H3K27ac  | 1     | GSM881366     | SRR414/SRR414955/SRR414955.sra |
| E14-day6        | H3K27me3 | 1     | GSM881367     | SRR414/SRR414956/SRR414956.sra |
| E14-day6        | H3K36me3 | 1     | GSM881368     | SRR414/SRR414957/SRR414957.sra |
| E14-day6        | H3K4me1  | 1     | GSM881369     | SRR414/SRR414958/SRR414958.sra |
| E14-day6        | H3K4me3  | 1     | GSM881371     | SRR414/SRR414960/SRR414960.sra |
| Heart (8 wks/o) | H3K27ac  | 1     | GSM1000093    | SRR566/SRR566827/SRR566827.sra |
| Heart (8 wks/o) | H3K27ac  | 2     | GSM1000093    | SRR566/SRR566828/SRR566828.sra |
| Heart (8 wks/o) | H3K27me3 | 1     | GSM1000131    | SRR566/SRR566903/SRR566903.sra |
| Heart (8 wks/o) | H3K27me3 | 2     | GSM1000131    | SRR566/SRR566904/SRR566904.sra |
| Heart (8 wks/o) | H3K36me3 | 1     | GSM1000130    | SRR566/SRR566901/SRR566901.sra |
| Heart (8 wks/o) | H3K36me3 | 2     | GSM1000130    | SRR566/SRR566902/SRR566902.sra |

*Continued on next page*



*Continued from previous page*

| Cell type       | Antibody | Rep # | GEO Accession | File URL suffix                |
|-----------------|----------|-------|---------------|--------------------------------|
| Heart (8 wks/o) | H3K4me1  | 1     | GSM769025     | SRR317/SRR317255/SRR317255.sra |
| Heart (8 wks/o) | H3K4me1  | 2     | GSM769025     | SRR317/SRR317256/SRR317256.sra |
| Heart (8 wks/o) | H3K4me3  | 1     | GSM769017     | SRR317/SRR317239/SRR317239.sra |
| Heart (8 wks/o) | H3K4me3  | 2     | GSM769017     | SRR317/SRR317240/SRR317240.sra |
| Heart (8 wks/o) | Input    | 1     | GSM769032     | SRR317/SRR317269/SRR317269.sra |
| Heart (8 wks/o) | Input    | 2     | GSM769032     | SRR317/SRR317270/SRR317270.sra |
| Liver (8 wks/o) | H3K27ac  | 1     | GSM1000140    | SRR566/SRR566921/SRR566921.sra |
| Liver (8 wks/o) | H3K27ac  | 2     | GSM1000140    | SRR566/SRR566922/SRR566922.sra |
| Liver (8 wks/o) | H3K27me3 | 1     | GSM1000150    | SRR566/SRR566941/SRR566941.sra |
| Liver (8 wks/o) | H3K27me3 | 2     | GSM1000150    | SRR566/SRR566942/SRR566942.sra |
| Liver (8 wks/o) | H3K36me3 | 1     | GSM1000151    | SRR566/SRR566943/SRR566943.sra |
| Liver (8 wks/o) | H3K36me3 | 2     | GSM1000151    | SRR566/SRR566944/SRR566944.sra |
| Liver (8 wks/o) | H3K4me1  | 1     | GSM769015     | SRR317/SRR317235/SRR317235.sra |
| Liver (8 wks/o) | H3K4me1  | 2     | GSM769015     | SRR317/SRR317236/SRR317236.sra |
| Liver (8 wks/o) | H3K4me3  | 1     | GSM769014     | SRR317/SRR317233/SRR317233.sra |
| Liver (8 wks/o) | H3K4me3  | 2     | GSM769014     | SRR317/SRR317234/SRR317234.sra |
| Liver (8 wks/o) | Input    | 1     | GSM769034     | SRR317/SRR317273/SRR317273.sra |
| Liver (8 wks/o) | Input    | 2     | GSM769034     | SRR317/SRR317274/SRR317274.sra |

## ***Mus musculus* RNA-seq source data (BAM files) [67, 65]**

For downloading, the URL must be constructed by adding one of the two following prefixes to each file listed:

1. <ftp://ftp.ncbi.nlm.nih.gov/geo/samples/GSM881nnn/>
2. <ftp://hgdownload.cse.ucsc.edu/goldenPath/mm9/encodeDCC/wgEncodeLicrRnaSeq/>

| Cell type       | Rep # | GEO Accession | File URL suffix                                                              |
|-----------------|-------|---------------|------------------------------------------------------------------------------|
| E14-day0        | 1     | GSM881355     | [ <i>prefix_1</i> ]GSM881355/supp1/GSM881355_E14_RNA.bam.gz                  |
| E14-day4        | 1     | GSM881364     | [ <i>prefix_1</i> ]GSM881364/supp1/GSM881364_E14_RNA_d4.bam.gz               |
| E14-day6        | 1     | GSM881373     | [ <i>prefix_1</i> ]GSM881373/supp1/GSM881373_E14_RNA_d6.bam.gz               |
| Heart (8 wks/o) | 1     | GSM929707     | [ <i>prefix_2</i> ]wgEncodeLicrRnaSeqHeartCe11PapMAdu1t8wksC57b16A1nRep1.bam |
| Heart (8 wks/o) | 2     | GSM929707     | [ <i>prefix_2</i> ]wgEncodeLicrRnaSeqHeartCe11PapMAdu1t8wksC57b16A1nRep2.bam |
| Liver (8 wks/o) | 1     | GSM929711     | [ <i>prefix_2</i> ]wgEncodeLicrRnaSeqLiverCe11PapMAdu1t8wksC57b16A1nRep1.bam |
| Liver (8 wks/o) | 2     | GSM929711     | [ <i>prefix_2</i> ]wgEncodeLicrRnaSeqLiverCe11PapMAdu1t8wksC57b16A1nRep2.bam |

## *Drosophila melanogaster* source data of ChIP-seq on histone H3 modifications (SRA files) [61, 63]

For downloading, the URL must be constructed by adding the following prefix to each file listed:

<ftp://ftp-trace.ncbi.nlm.nih.gov/sra/sra-instant/reads/ByRun/sra/SRR/SRR030/>

| Developmental time point/period | Antibody | GEO Accession | File URL suffix         |
|---------------------------------|----------|---------------|-------------------------|
| 0-4h embryos                    | H3K27ac  | GSM401407     | SRR030295/SRR030295.sra |
| 0-4h embryos                    | H3K27me3 | GSM439448     | SRR030360/SRR030360.sra |
| 0-4h embryos                    | H3K4me1  | GSM401409     | SRR030297/SRR030297.sra |
| 0-4h embryos                    | H3K4me3  | GSM400656     | SRR030269/SRR030269.sra |
| 0-4h embryos                    | H3K9ac   | GSM401408     | SRR030296/SRR030296.sra |
| 0-4h embryos                    | H3K9me3  | GSM439457     | SRR030369/SRR030369.sra |
| 0-4h embryos                    | Input    | GSM400657     | SRR030270/SRR030270.sra |
| 4-8h embryos                    | H3K27ac  | GSM401404     | SRR030292/SRR030292.sra |
| 4-8h embryos                    | H3K27me3 | GSM439447     | SRR030359/SRR030359.sra |
| 4-8h embryos                    | H3K4me1  | GSM401406     | SRR030294/SRR030294.sra |
| 4-8h embryos                    | H3K4me3  | GSM400674     | SRR030287/SRR030287.sra |
| 4-8h embryos                    | H3K9ac   | GSM401405     | SRR030293/SRR030293.sra |
| 4-8h embryos                    | H3K9me3  | GSM439456     | SRR030368/SRR030368.sra |
| 4-8h embryos                    | Input    | GSM400675     | SRR030288/SRR030288.sra |
| 8-12h embryos                   | H3K27ac  | GSM432583     | SRR030332/SRR030332.sra |
| 8-12h embryos                   | H3K27me3 | GSM439446     | SRR030358/SRR030358.sra |
| 8-12h embryos                   | H3K4me1  | GSM432593     | SRR030342/SRR030342.sra |
| 8-12h embryos                   | H3K4me3  | GSM432585     | SRR030334/SRR030334.sra |
| 8-12h embryos                   | H3K9ac   | GSM432592     | SRR030341/SRR030341.sra |
| 8-12h embryos                   | H3K9me3  | GSM439455     | SRR030367/SRR030367.sra |
| 8-12h embryos                   | Input    | GSM432636     | SRR030346/SRR030346.sra |
| 12-16h embryos                  | H3K27ac  | GSM432582     | SRR030331/SRR030331.sra |
| 12-16h embryos                  | H3K27me3 | GSM439445     | SRR030357/SRR030357.sra |
| 12-16h embryos                  | H3K4me1  | GSM432591     | SRR030340/SRR030340.sra |
| 12-16h embryos                  | H3K4me3  | GSM432580     | SRR030329/SRR030329.sra |
| 12-16h embryos                  | H3K9ac   | GSM439458     | SRR030370/SRR030370.sra |
| 12-16h embryos                  | H3K9me3  | GSM439454     | SRR030366/SRR030366.sra |
| 12-16h embryos                  | Input    | GSM432634     | SRR030344/SRR030344.sra |
| 16-20h embryos                  | H3K27ac  | GSM401401     | SRR030289/SRR030289.sra |
| 16-20h embryos                  | H3K27me3 | GSM439444     | SRR030356/SRR030356.sra |

*Continued on next page*

*Continued from previous page*

| <b>Developmental time point/period</b> | <b>Antibody</b> | <b>GEO Accession</b> | <b>File URL suffix</b>  |
|----------------------------------------|-----------------|----------------------|-------------------------|
| 16-20h embryos                         | H3K4me1         | GSM401403            | SRR030291/SRR030291.sra |
| 16-20h embryos                         | H3K4me3         | GSM400658            | SRR030271/SRR030271.sra |
| 16-20h embryos                         | H3K9ac          | GSM401402            | SRR030290/SRR030290.sra |
| 16-20h embryos                         | H3K9me3         | GSM439453            | SRR030365/SRR030365.sra |
| 16-20h embryos                         | Input           | GSM400659            | SRR030272/SRR030272.sra |
| 20-24h embryos                         | H3K27ac         | GSM401423            | SRR030311/SRR030311.sra |
| 20-24h embryos                         | H3K27me3        | GSM439443            | SRR030355/SRR030355.sra |
| 20-24h embryos                         | H3K4me1         | GSM439464            | SRR030376/SRR030376.sra |
| 20-24h embryos                         | H3K4me3         | GSM400672            | SRR030285/SRR030285.sra |
| 20-24h embryos                         | H3K9ac          | GSM401424            | SRR030312/SRR030312.sra |
| 20-24h embryos                         | H3K9me3         | GSM439452            | SRR030364/SRR030364.sra |
| 20-24h embryos                         | Input           | GSM400673            | SRR030286/SRR030286.sra |
| L1 larvae                              | H3K27ac         | GSM432581            | SRR030330/SRR030330.sra |
| L1 larvae                              | H3K27me3        | GSM439442            | SRR030354/SRR030354.sra |
| L1 larvae                              | H3K4me1         | GSM432588            | SRR030337/SRR030337.sra |
| L1 larvae                              | H3K4me3         | GSM400662            | SRR030275/SRR030275.sra |
| L1 larvae                              | H3K9ac          | GSM401422            | SRR030310/SRR030310.sra |
| L1 larvae                              | H3K9me3         | GSM439451            | SRR030363/SRR030363.sra |
| L1 larvae                              | Input           | GSM400663            | SRR030276/SRR030276.sra |
| L2 larvae                              | H3K27ac         | GSM401419            | SRR030307/SRR030307.sra |
| L2 larvae                              | H3K27me3        | GSM439441            | SRR030353/SRR030353.sra |
| L2 larvae                              | H3K4me1         | GSM401421            | SRR030309/SRR030309.sra |
| L2 larvae                              | H3K4me3         | GSM400668            | SRR030281/SRR030281.sra |
| L2 larvae                              | H3K9ac          | GSM401420            | SRR030308/SRR030308.sra |
| L2 larvae                              | H3K9me3         | GSM439450            | SRR030362/SRR030362.sra |
| L2 larvae                              | Input           | GSM400669            | SRR030282/SRR030282.sra |
| Pupae                                  | H3K27ac         | GSM401413            | SRR030301/SRR030301.sra |
| Pupae                                  | H3K27me3        | GSM439439            | SRR030351/SRR030351.sra |
| Pupae                                  | H3K4me1         | GSM401415            | SRR030303/SRR030303.sra |
| Pupae                                  | H3K4me3         | GSM400664            | SRR030277/SRR030277.sra |
| Pupae                                  | H3K9ac          | GSM401414            | SRR030302/SRR030302.sra |
| Pupae                                  | H3K9me3         | GSM439449            | SRR030361/SRR030361.sra |
| Pupae                                  | Input           | GSM400665            | SRR030278/SRR030278.sra |

## ***Drosophila melanogaster* RNA-seq source data (SAM files) [61, 63]**

For downloading, the URL must be constructed by adding the following prefix to each file listed:

`ftp://data.modencode.org/all_files/dmel-signal-1/`

| <b>Developmental time point/period</b> | <b>GEO Accession</b> | <b>File URL suffix</b>          |
|----------------------------------------|----------------------|---------------------------------|
| 0-4h embryos                           | GSM451806            | 2010_0-4_accepted_hits.sam.gz   |
| 4-8h embryos                           | GSM451809            | 2019_4-8_accepted_hits.sam.gz   |
| 8-12h embryos                          | GSM451808            | 2020_8-12_accepted_hits.sam.gz  |
| 12-16h embryos                         | GSM451803            | 2021_12-16_accepted_hits.sam.gz |
| 16-20h embryos                         | GSM451807            | 2022_16-20_accepted_hits.sam.gz |
| 20-24h embryos                         | GSM451810            | 2023_20-24_accepted_hits.sam.gz |
| L1 larvae                              | GSM451811            | 2024_L1_accepted_hits.sam.gz    |
| L2 larvae                              | GSM453867            | 2025_L2_accepted_hits.sam.gz    |
| Pupae                                  | GSM451813            | 2030_Pupae_accepted_hits.sam.gz |
